1           **Thresholds for post-rebound SHIV control after CCR5 gene-edited**  
2                           **autologous hematopoietic cell transplantation**

3                           Short title: SHIV remission after  $\Delta$ CCR5 HSPC transplantation

4  
5  
6   E. Fabian Cardozo<sup>1</sup>, Elizabeth R. Duke<sup>1,3</sup>, Christopher W. Peterson<sup>2,3</sup>, Daniel B. Reeves<sup>1</sup>, Bryan  
7                           T Mayer<sup>1</sup>, Hans-Peter Kiem<sup>2,3,4</sup>, Joshua T. Schiffer<sup>1,2,3,\*</sup>

8  
9  
10                           <sup>1</sup>Vaccine and Infectious Disease Division,

11                           <sup>2</sup>Clinical Research Division, Fred Hutchinson Cancer Research Center, Seattle, WA, USA;

12                           <sup>3</sup>Department of Medicine and

13                           <sup>4</sup>Department of Pathology, University of Washington, Seattle, WA, USA.

14  
15  
16   \*Corresponding Author. Address: 1100 Fairview Ave. N. MS E4-100, Seattle, WA, 98119;

17                           email: [jschiffe@fredhutch.org](mailto:jschiffe@fredhutch.org); phone: (206)667-7359.

18  
19  
20                           Text word count: 3896.

21                           Abstract word count: 246.

22                           Number of figures: 7.

23                           Number of tables: 1.

## 24 **Key Points**

- 25 • Data-validated modeling suggest that loss of immune response after transplantation  
26 produces more depletion of CD4<sup>+</sup>CCR5<sup>+</sup> T cells post-ATI.
- 27 • The minimum fraction of transplanted gene-edited cells for viral control linearly relates  
28 with the CD4<sup>+</sup>CCR5<sup>+</sup> T cell nadir 10 weeks post-ATI.

29 **Abstract (246/250 words)**

30           The two recent cases of HIV cure/stable remission following allogeneic stem cell  
31 transplantation are difficult to reproduce because of the toxicity of the procedure and rarity of  
32 donors homozygous for the CCR5 $\Delta$ 32 deletion. One approach to overcome these barriers is the  
33 use of autologous, CCR5 gene-edited hematopoietic stem and progenitor cell (HSPC) products.  
34 Unlike allogeneic transplantation, in which the frequency of CCR5 $\Delta$ 32 donor cells approaches  
35 100%, the CCR5 gene can currently only be edited *ex vivo* in a fraction of autologous HSPCs.  
36 Therefore, we sought to determine the minimum fraction required for viral control using  
37 mathematical modeling. We analyzed data from eight juvenile pigtail macaques infected  
38 intravenously with SHIV-1157ipd3N4, treated with combination antiretroviral therapy (cART),  
39 and infused with autologous HSPCs without CCR5 gene editing. We developed a mathematical  
40 model that simultaneously describes reconstitution of CD4<sup>+</sup>CCR5<sup>+</sup>, CD4<sup>+</sup>CCR5<sup>-</sup>, and CD8<sup>+</sup> T  
41 cell counts, as well as SHIV plasma viral loads in control and transplanted macaques. The model  
42 predicts that transplantation decreases the immunologic response to SHIV to varying degrees in  
43 macaques. By modifying the model to hypothetically describe transplantation with a given  
44 fraction of protected CCR5-edited cells we found that loss of immunologic response correlated  
45 with a more profound depletion of CCR5<sup>+</sup>CD4<sup>+</sup> T cells and a higher fractions of gene-edited  
46 cells required for cART-free viral remission. Our results provide a framework to predict the  
47 likelihood of post-rebound control *in vivo* using the percentage of CCR5-edited cells in  
48 peripheral blood and the loss of HIV-specific immunity following autologous HSPC.

49 (Main text: 3896/4000 words, including headings)

## 50 INTRODUCTION

51 The major obstacle to HIV-1 eradication is a latent reservoir of long-lived infected cells<sup>1-</sup>  
52 <sup>3</sup>. Cure strategies aim to eliminate all infected cells or permanently prevent viral reactivation  
53 from latency. The only known case of HIV cure<sup>4,5</sup> and an additional, recently-reported case of  
54 prolonged remission<sup>6</sup>, resulted from allogeneic hematopoietic stem cell transplant with  
55 homozygous CCR5 $\Delta$ 32 donor cells<sup>4-6</sup>. The success of this procedure is likely multifactorial—in  
56 part attributable to HIV resistance of the transplant product, the conditioning regimen that  
57 facilitates engraftment and also eliminates infected cells, graft-versus-host effect, and  
58 immunosuppressive therapies for graft-versus-host disease<sup>7-11</sup>.

59 A current research focus is to recapitulate this method of cure with minimal toxicity. One  
60 method is to perform autologous transplantation following *ex vivo* inactivation of the CCR5 gene  
61 with gene editing nucleases, eliminating the need for allogeneic CCR5-negative donors<sup>12,13</sup>.  
62 While this procedure is safe and feasible in pigtail macaques infected with simian-human  
63 immunodeficiency virus (SHIV)<sup>13-16</sup>, only a fraction of HSPCs can be genetically modified *ex*  
64 *vivo* to be HIV-resistant.

65 To address this challenge, we developed a mathematical model to predict the minimum  
66 threshold of persisting, gene-modified cells necessary for functional cure. First, we modeled the  
67 kinetics of CD4<sup>+</sup>CCR5<sup>+</sup>, CD4<sup>+</sup> CCR5<sup>-</sup>, and CD8<sup>+</sup> T cell reconstitution after autologous  
68 transplantation. We then modeled SHIV rebound kinetics following analytical treatment  
69 interruption (ATI) and identified the degree of loss of anti-HIV cytolytic immunity following  
70 transplantation. Finally, we projected the proportion of gene-modified cells and the levels of  
71 SHIV-specific immunity required to eliminate viral replication following ATI.

## 72 **METHODS**

### 73 **Experimental Data**

74 Eight juvenile pigtail macaques were intravenously challenged with 9500 TCID50 SHIV-  
75 1157ipd3N4 (SHIV-C)<sup>14,17</sup>. After 6 months, the macaques received combination antiretroviral  
76 therapy (cART: tenofovir [PMPA], emtricitabine [FTC], and raltegravir [RAL]). After ~30  
77 weeks on cART, four animals received total body irradiation (TBI) followed by transplantation  
78 of autologous HSPCs. After an additional 25 weeks following transplant, when viral load was  
79 fully suppressed, animals underwent analytical treatment interruption (ATI) of cART<sup>14</sup>. A  
80 control group of four animals did not receive TBI or HSPC transplantation and underwent ATI  
81 after ~50 weeks of treatment (**Fig. 1A**). Plasma viral loads and absolute quantified CD4<sup>+</sup>CCR5<sup>-</sup>,  
82 CD4<sup>+</sup>CCR5<sup>+</sup> and CD8<sup>+</sup> total and subsets (naïve, central memory [T<sub>CM</sub>], and effector memory  
83 [T<sub>EM</sub>]) T cell counts from peripheral blood were measured as described previously<sup>14,17</sup>. We  
84 analyzed peripheral T cell counts and plasma viral load from transplant until 43 weeks post-  
85 transplant (~25 weeks pre-ATI and ~20 weeks post-ATI).

86

### 87 **Mathematical modeling**

88 We employed several series of ordinary differential equation models of cellular and viral  
89 dynamics after transplantation (**Fig. 1B**). First, we modeled T cell dynamics and reconstitution  
90 following transplant and before ATI, assuming that low viral loads on ART do not affect cell  
91 dynamics (**Fig. 1C**). After curation of that model, we introduced viral dynamics and fit those to  
92 the T cell and viral rebound dynamics from the animals pre- and post-ATI (**Fig. 1D**). Lastly, we  
93 applied our complete model to a transplant scenario with gene editing of CCR5 to predict the  
94 minimal threshold of editing for functional HIV cure (**Fig. 1E**).

95  
96 *T cell reconstitution after transplantation:* We modeled the kinetics of CD4<sup>+</sup> and CD8<sup>+</sup> T cell  
97 subsets in blood, transplanted cells that home to the BM, and progenitor cells in the BM/thymus  
98 as shown in **Fig. 1C**. We included CD8<sup>+</sup> T cells in the model because CD8<sup>+</sup> and CD4<sup>+</sup> T cells  
99 may arise from new naïve cells from the thymus and compete for resources that impact clonal  
100 expansion and cell survival<sup>18-20</sup>. At the moment of HSPC infusion, transplanted animals are  
101 lymphopenic due to TBI. The control group did not have a transplanted-cell compartment, and  
102 all other compartments remained in steady state. We assumed that CD4<sup>+</sup> and CD8<sup>+</sup> T cell  
103 expansion may have two possible drivers: (1) lymphopenia-induced proliferation of mature cells  
104 that persist through myeloablative TBI<sup>18,21-25</sup>, and (2) differentiation from naïve cells from  
105 progenitors in the thymus (from transplanted CD34<sup>+</sup> HSPCs<sup>26,27</sup> or CD34<sup>+</sup> HSPCs that persist  
106 following TBI) and further differentiation to an activated effector state<sup>24,25,28-32</sup>. We assumed that  
107 in a lymphopenic environment, factors that drive T cell proliferation are more accessible (i.e.,  
108 self-MHC molecules on antigen-presenting cells<sup>28,29,33,34</sup> and  $\gamma$ -chain cytokines such as IL-7 and  
109 IL-15<sup>21-23,35-37</sup>). However, as they grow, cells compete for access to these resources, limiting  
110 clonal expansion<sup>18</sup> such that logistic growth models are appropriate<sup>19</sup>. We assume that new  
111 peripheral CD4<sup>+</sup> and CD8<sup>+</sup> T naïve cells come from a progenitor compartment in the  
112 BM/Thymus<sup>38,39</sup>. For CD4<sup>+</sup> T cells, we assume that naïve cells do not express CCR5<sup>40-42</sup>, and  
113 subsequently up- and/or down-regulate expression of the CCR5 receptor<sup>30</sup>. For CD8<sup>+</sup> T cells, we  
114 included a single CD8<sup>+</sup> memory precursor compartment of T<sub>N</sub> and T<sub>CM</sub> cells that differentiate  
115 linearly into T<sub>EM</sub> during lymphopenia<sup>43-45</sup>. The details of the model are presented in the **Supp.**  
116 **Material** and in **Fig. 1C** with the notation described in **Table 1**. A parsimonious, curated version

117 of this model was selected from a series of models with varying mechanistic and statistical  
118 complexity as presented in the **Supp. Materials**.

119

120 *T cell and viral dynamics:* We next adapted the curated T cell reconstitution model by combining  
121 several adaptations of the canonical model of viral dynamics<sup>43-53</sup> as shown in **Fig. 1D**. The model  
122 assumes that SHIV infects only CD4<sup>+</sup>CCR5<sup>+</sup> T cells<sup>17</sup> and that a small fraction (~ 5%) of those  
123 infected cells are able to produce infectious virus<sup>51,54,55</sup>. We modeled cART by reducing the  
124 infection rate to zero and modeled ATI by assuming infection is greater than zero after some  
125 time  $\Delta_t$  after interruption. This model assumes that productively infected cells arise also from  
126 activation of a steady set of latently infected cells. The presence of both unproductively and  
127 productively infected cells leads to the expansion of CD8<sup>+</sup> T<sub>naïve</sub> and T<sub>CM</sub> cells, from which the  
128 majority of dividing cells differentiate into SHIV-specific effector cells<sup>30,46,47,52,53</sup>. The details of  
129 the model are presented in the **Supp. Material** and in **Fig. 1D** with the notation described in  
130 **Table 1**. A parsimonious version of this model was selected from a series of models with  
131 varying mechanistic and statistical complexity as presented in the **Supp. Materials**.

132

133 *Viral and T cell dynamics in the setting of  $\Delta$ CCR5 HSPC transplantation:* We next adapted our  
134 full model to simulate scenarios in which autologous transplantation includes cells that are  
135 CCR5-edited (**Fig 1E**). We added variables representing CCR5-edited HSPCs in different  
136 compartments: (1) infused HSPCs in blood, (2) T cell progenitors in BM/thymus, and (3)  
137 CD4<sup>+</sup>CCR5<sup>-</sup> T cells in blood. These compartments have the same structure as CCR5-non-edited  
138 cells but with two differences. First, the value of gene-edited HSPCs at transplantation is a

139 fraction  $f_p$  of the total number of infused cells. Second, mature, CCR5-edited CD4<sup>+</sup>CCR5<sup>-</sup> cells  
140 do not upregulate CCR5 (see full model in **Supp. Materials**).

141

## 142 **Fitting procedure and model selection**

143 To fit our models (**Fig. 1C-D**) to the transplant data, we used a nonlinear mixed-effects  
144 modeling approach<sup>56</sup> described in detail in the **Supp. materials**. Briefly, we estimated the  
145 population mean and variance for each model parameter using the Stochastic Approximation  
146 Expectation Maximization (SAEM) algorithm embedded in the Monolix software  
147 ([www.lixoft.eu](http://www.lixoft.eu)). For a subset of parameters, random effects were specified, and those variances  
148 were estimated. Measurement error variance was also estimated assuming an additive error  
149 model for the logged outcome variables.

150 We first fit instances of models with varying statistical and parameter complexity in **Fig.**  
151 **1C** to blood T cell counts during transplant and before ATI assuming that one or multiple  
152 mechanisms are absent, or that certain mechanisms have equal kinetics (**Table S1** includes all 19  
153 competing models). Then, we fit several instances of the model **Fig. 1D** to blood T cell counts  
154 and plasma viral load during the period after transplant including ATI using the best competing  
155 model (solid lines) for the model in **Fig. 1C** (**Table S2** includes all 15 competing models  
156 including viral dynamics). To determine the best and most parsimonious model among the  
157 instances, we computed the log-likelihood ( $\log L$ ) and the Akaike Information Criteria ( $AIC = -$   
158  $2\log L + 2m$ , where  $m$  is the number of parameters estimated)<sup>57</sup>. We assumed a model has similar  
159 support from the data if the difference between its AIC and the best model (lowest) AIC is less  
160 than two<sup>57</sup> (see **Supp. materials** for details).



161 Simulations for each animal were computed using individual-level parameter estimates  
162 generated from the predicted random effects of the fitted population model.

163

164 **Data sharing statement.** Original data will be shared upon request.

165

## 166 **RESULTS**

167 **CD4<sup>+</sup>CCR5<sup>+</sup> and CD8<sup>+</sup> T cells recover more rapidly than CD4<sup>+</sup>CCR5<sup>-</sup> T cells after HSPC**

168 **transplantation.** We analyzed the kinetics of peripheral blood CD4<sup>+</sup>CCR5<sup>+</sup> and CD4<sup>+</sup>CCR5<sup>-</sup> T-

169 cells, and total, T<sub>naïve</sub>, T<sub>CM</sub>, and T<sub>EM</sub> CD8<sup>+</sup> T-cells in macaques after HSPC transplantation. In

170 controls, levels of CD4<sup>+</sup> and CD8<sup>+</sup> T cells oscillated around a persistent set point (**Fig. S1**). CD4<sup>+</sup>

171 CCR5<sup>+</sup> T cell levels were ~100 cells/μl and were uniformly lower than the CD4<sup>+</sup>CCR5<sup>-</sup> T cell

172 counts (~1200 cells/μl) (p=0.01, paired t-test of the averaged post-transplant measures, **Fig. 2A**).

173 Total CD8<sup>+</sup> T cell levels in the control group were ~1400 cells/μl with a greater contribution

174 from T<sub>EM</sub> (73%) than T<sub>N</sub>+T<sub>CM</sub> (27%) (based on median values, **Fig. 2B**).

175 In the transplant group, CD4<sup>+</sup> and CD8<sup>+</sup> T cells expanded at different rates from the

176 remaining levels post-TBI (**Fig. 2C-D**). The levels of CD4<sup>+</sup>CCR5<sup>+</sup> T cells started at 1-10 cells/μl

177 and reconstituted to levels similar to the control group over 5-10 weeks (**Fig. 2D**). After TBI,

178 CD4<sup>+</sup>CCR5<sup>-</sup> T cells remained at higher levels (~100 cells/μl) than CD4<sup>+</sup>CCR5<sup>+</sup> T cells but

179 expanded more slowly and did not reach the values of the control group after 25 weeks (**Figs.**

180 **2C-D**). The CD4<sup>+</sup>CCR5<sup>+</sup> T cell compartment expanded 8-fold more rapidly than the CD4<sup>+</sup>CCR5<sup>-</sup>

181 compartment (p=0.01, paired t-test, **Figs. 2C-D**). CD8<sup>+</sup> T cells decreased to levels between 10

182 and 100 cells/μl after TBI but recovered to levels below the control group in 5 weeks (**Figs. 2C-**

183 **D**); CD8<sup>+</sup> T cells recovered as rapidly as the CD4<sup>+</sup>CCR5<sup>+</sup> population (**Figs. 2C-D**).

184 Overall, these results show that after transplantation there is a faster reconstitution of  
185  $CD4^+CCR5^+$  and  $CD8^+$  T cells compared to  $CD4^+CCR5^-$  cells, suggesting each cell subset may  
186 have different mechanisms that drive their expansion. To explore these mechanisms, we  
187 analyzed the data in the context of mechanistic mathematical models of cell dynamics.

188

189 **Lymphopenia-induced proliferation drives early  $CD4^+CCR5^+$  and  $CD8^+$  T cell**  
190 **reconstitution after HPSC transplantation.** To identify the main drivers of T cell  
191 reconstitution after transplant, we developed a mathematical model that considered plausible  
192 mechanisms underlying reconstitution of distinct T cell subsets following autologous  
193 transplantation (**Fig. 1C**). We built 19 versions of the model by assuming that one or multiple  
194 mechanisms are absent, or by assuming certain mechanisms have equivalent or differing kinetics  
195 (**Table S1**). Using model selection theory based on AIC, we identified the model in **Fig. 1C**  
196 without the dashed lines which most parsimoniously reproduces the data (**Table S1**). The best  
197 fits of this model are presented in **Fig. 2D** and **Fig. S1** with the respective parameter estimates in  
198 **Tables S3-S4**. The main features of this model are: (1)  $CD4^+CCR5^+$  T cell reconstitution after  
199 transplant is driven by proliferation and upregulation of CCR5; (2)  $CD4^+CCR5^-$  T cell expansion  
200 is driven only by new naïve cells from the thymus and not proliferation; and (3), thymic export  
201 rates are equal between  $CD4^+$  and  $CD8^+$  naïve T cells.

202 The best fit model predicts that  $CD4^+CCR5^-$  T cells have a delayed reconstitution that  
203 occurs only when cells from the thymus (estimated with rate  $\sim 0.01/\text{day}$ ) outnumber their loss due  
204 to death, trafficking to tissues, or upregulation of CCR5. Furthermore, the estimated  
205  $CD4^+CCR5^+$  T cell proliferation rate ( $\sim 0.1/\text{day}$ ) far exceeds the estimated CCR5 upregulation  
206 ( $\sim 0.004/\text{day}$ ) and thymic export rates ( $\sim 0.01/\text{day}$ ). Therefore, one month after transplantation, the

207 total concentration of CD4<sup>+</sup>CCR5<sup>+</sup> T new cells generated by proliferation is predicted to be 40-  
208 fold higher than the concentration generated by up-regulation of CCR5 (**Fig. 3**).

209 Our model predicts that CD8<sup>+</sup> T cells follow a similar pattern to CD4<sup>+</sup>CCR5<sup>+</sup> T cells  
210 (**Fig. 2D**), as the CD8<sup>+</sup> T<sub>EM</sub> proliferation rate is up to 10-fold higher than the CD8<sup>+</sup> T cell  
211 differentiation rate (**Fig. S2**). Overall, these results suggest that following autologous HSPC  
212 transplant: (1) slow thymic export is the main driver of CD4<sup>+</sup>CCR5<sup>-</sup> T cell growth, and (2) rapid  
213 lymphopenia-induced proliferation of remaining cells (rather than transplanted cells) after TBI is  
214 the main driver for CD4<sup>+</sup>CCR5<sup>+</sup> and CD8<sup>+</sup> T cell expansion.

215

216 **Reduction of blood CD4<sup>+</sup>CCR5<sup>+</sup> T cell counts correlates with plasma viral rebound after**  
217 **ATI in animals that underwent HSPC transplantation.** We next aimed to extend previous  
218 analysis comparing plasma viral load rebound kinetics to CD4<sup>+</sup>CCR5<sup>+</sup> and CCR5<sup>-</sup> T cell subset  
219 dynamics after ATI<sup>14,51</sup>. **Fig. 4** and **Fig. S3** presents the plasma viral loads and the blood  
220 CD4<sup>+</sup>CCR5<sup>+</sup> and CD4<sup>+</sup>CCR5<sup>-</sup> T cell kinetics before and after ATI in transplanted and control  
221 macaques respectively. Viral burden after ATI was more pronounced in the transplant group  
222 compared to the control group: median peak viral load was 10-fold higher (p=0.06, Mann-  
223 Whitney test. See **Fig. 4A**) and median final viral load measurements at necropsy were 2-log<sub>10</sub>  
224 higher (p=0.06, Mann-Whitney test. See **Fig.4B**). CD4<sup>+</sup>CCR5<sup>+</sup> T-cell counts decreased after ATI  
225 in the transplant group reaching a significantly lower nadir (~8-fold) than the control animals  
226 (p=0.01, Mann-Whitney test. **Fig. 4C**). The two animals with the largest reduction of  
227 CD4<sup>+</sup>CCR5<sup>+</sup> T cells had the highest viral set points. There was no difference between control  
228 and transplant groups' CD4<sup>+</sup>CCR5<sup>-</sup> T cell nadir: both groups had an average reduction of ~200  
229 cells/μL (**Fig.4D**).

230 In the control group, individual plasma viral loads did not correlate with corresponding  
231  $CD4^+CCR5^+$  T-cell counts post-ATI. However, in three animals in the transplant group, viral  
232 load observations post-ATI correlated negatively with their corresponding  $CD4^+CCR5^+$  T cell  
233 counts (**Fig. S4**).

234 Overall, these results show that transplanted animals had higher viral load that correlated  
235 with the reduction of  $CD4^+CCR5^+$  T cells after ATI. This suggests that transplantation might  
236 affect macaques' immunologic response to SHIV so that the presence of the virus leads to more  
237 depletion of  $CD4^+CCR5^+$  T cells. We explore this possibility by simultaneously analyzing the  
238 viral and T cell subset observations using novel mechanistic mathematical models.

239

240 **Higher viral set points and  $CD4^+CCR5^+$  T-cell depletion following transplantation and ATI**  
241 **are due to a reduction in SHIV-specific immunity.** To understand why transplantation may  
242 have an effect on plasma viral load and  $CD4^+CCR5^+$  T cell kinetics during ATI, we modified our  
243 mathematical model to include SHIV infection as described in **Fig. 1D (Methods)**. Using model  
244 selection theory based on AIC, we found that the most parsimonious model to explain the data  
245 was the one without the dashed lines in **Fig. 1D (Table S2)**. The best fit model simultaneously  
246 recapitulates plasma viral rebound and the kinetics of  $CD4^+CCR5^+$  and  $CCR5^-$  T cells in each  
247 animal as shown in **Fig. 4E** and **Fig. S3** with corresponding estimated parameters in **Table 1** and  
248 **Table S5-S6**. In the best fit model, SHIV-specific  $CD8^+$  effector cells reduce virus production in  
249 a non-cytolytic manner<sup>58-60</sup>, possibly by secretion of HIV-antiviral factors<sup>61-64</sup>—not included in  
250 the model. Additionally, the model suggests that infection leads to enhanced activation of  
251  $CD4^+CCR5^-$  T cells leading to replenishment of  $CD4^+CCR5^+$  T cells, explaining the  
252 concentration reduction of the  $CD4^+CCR5^-$  compartment after ATI<sup>65-68</sup>.

253 From the estimated parameters, only SHIV-based CD8<sup>+</sup> proliferation rate,  $\omega_8$ , correlated  
254 positively with post-ATI CD4<sup>+</sup>CCR5<sup>+</sup> T-cell nadir and negatively with viral load set point (**Fig.**  
255 **5A-B**). We also found that the estimated SHIV-based CD8<sup>+</sup> proliferation rate was significantly  
256 lower in the transplant group, and the estimated time to viral rebound ( $\Delta_t$ ) was significantly  
257 higher in the transplant group (**Fig. 5C-D**). The projected fraction of SHIV-specific CD8<sup>+</sup> T cells  
258 in the transplant group approached zero (**Fig. S5**). Overall, these results suggest that a lower  
259 nadir of CD4<sup>+</sup>CCR5<sup>+</sup> T cells and a higher viral load after ATI in transplanted animals is due to a  
260 loss of the immune response to SHIV-infected cells.

261  
262 **Greater loss of immunologic control during TBI/transplant requires higher numbers of**  
263 **CCR5-edited HSPCs to control viral rebound after ATI.** To calculate the minimum threshold  
264 of CCR5-edited cells necessary to induce cART-independent virus suppression, we added a  
265 population of transplanted, gene-edited CCR5 HSPCs to our complete, fitted model of T cell  
266 subset and viral dynamics. We assumed that in the infused product there is a fraction  $f_p$  of HSPCs  
267 that have a biallelically-modified CCR5 gene and do not express CCR5. In the model we added  
268 state variables for protected progenitors and CD4<sup>+</sup>CCR5<sup>-</sup> T cells that cannot become  
269 CD4<sup>+</sup>CCR5<sup>+</sup> T cells (**Fig. 1E**, full model in **Supp. Materials**).

270 We simulated the model using parameter values obtained from the best fit in the previous  
271 section for each animal in the transplant group using 100 values of  $f_p$  from zero to one (0-100%  
272 CCR5-edited HSPCs). The minimal initial fraction to achieve post-rebound viral control was  
273 dependent on the underlying viral and immune dynamics of the given animal. For example, **Fig.**  
274 **6A** depicts projections of the model using the best estimates from the fits of the model to  
275 transplanted animal Z09144 using six values of  $f_p$ : an initial fraction of protected cells smaller

276 than or equal to 40% will not lead to post-rebound viral control after ATI, even after a year.  
277 However, when  $f_p$  is 60% or greater than 80% it is possible to have a spontaneous post-rebound  
278 viral control at ~40 weeks and 10 weeks after ATI respectively. In both cases, a period of high-  
279 level viremia occurs prior to control.

280 The heatmaps in **Fig. 6B-E** show plasma viral load projections over 2 years after the start  
281 of ATI for different values of  $f_p$ . The model predicts that the minimum  $f_p$  to maintain post-  
282 rebound control for 2 years after ATI is higher for animals with lower estimated SHIV-specific  
283 immune response rates. For the two animals in the transplant group with lower viral setpoints,  
284 the minimum  $f_p$  for viral control was 35% and 19% (**Fig. 6D-E**). In contrast, for the other two  
285 animals, the minimum  $f_p$  for viral control was 56% and 97% (**Fig. 6B-C**). These model  
286 projections suggest that a larger loss of immunologic control during TBI/HSPC transplant results  
287 in a higher fraction of CCR5 gene-edited cells required for control of viral rebound after ATI.

288 The model also predicts that for some values of  $f_p$  it is possible to have two viral load  
289 stages after ATI: a temporary high viral set point in the first weeks after ATI may be followed by  
290 a delayed ART-free viral remission stage (e.g. when  $f_p$  is between 60% and 70% in **Fig. 6B** or  
291 between 5% and 20% in **Fig. 6E**). Therefore, in some cases the viral load set point determined  
292 during the initial weeks after ATI might not be a sufficient surrogate to predict viral control  
293 further in the future. On the other hand, when we project the CD4<sup>+</sup>CCR5<sup>+</sup> T cell count for the  
294 same example in **Fig. 6A** we find that this cell subset does not undergo a significant change  
295 between weeks 2 and 10 after ATI for different scenarios of  $f_p$  (**Fig. 7A**). Moreover, the  
296 maximum decrease of CD4<sup>+</sup>CCR5<sup>+</sup> T cells observed during the first 10 weeks after ATI is  
297 predicted to have a linear relationship with the minimum initial fraction of protected cells  
298 required to obtain post-rebound control after 2 years (**Fig. 7B**). Therefore, the maximum initial

299 change in CD4<sup>+</sup>CCR5<sup>+</sup> T cells 10 weeks after ATI, as well as the observed experimental value  
300 for  $f_p$ , might predict late viral control.

## 301 **Discussion**

302 Here we introduce a data-validated mathematical model that to our knowledge is the first  
303 to simultaneously recapitulate SHIV viral loads, and CD4<sup>+</sup> and CD8<sup>+</sup> T cell subset counts during  
304 HIV or SHIV infection. We systematically selected from a series of models to arrive at a set of  
305 equations that most parsimoniously explains the available data. We recapitulated (1) peripheral  
306 CD4<sup>+</sup> and CD8<sup>+</sup> T-cell subset reconstitution dynamics following transplant, and (2) T-cell  
307 dynamics and SHIV viral rebound following ATI. Before ATI, all animals suppressed plasma  
308 viral load below the limit of detection, allowing analysis of T cell reconstitution dynamics  
309 independent of virus-mediated pressure. At each step, we applied model selection theory to  
310 select the simplest set of mechanisms capable of explaining the observed data<sup>57</sup>.

311 The model predicts that post-rebound viral control might be possible during autologous  
312 gene-edited HSPC transplantation if therapy achieves (1) a sufficient fraction of gene-protected,  
313 autologous HSPCs, and (2) maintenance or enhancement of SHIV-specific immune responses  
314 following transplantation. Specifically, the model predicts that increasing amounts of  
315 conditioning regimen-dependent depletion of the SHIV-specific immune response leads to a  
316 higher threshold of CCR5-gene-edited cells in the transplanted HSPC product that is required to  
317 obtain stable, ART-free viral control. These results are consistent with the cure achieved by the  
318 Berlin patient who received transplant with 100% HIV-resistant cells after intense  
319 conditioning<sup>4,5</sup>. In the autologous setting where 100% CCR5 editing may not be feasible,  
320 adjunctive measures that augment virus-specific immunity, such as therapeutic vaccination,

321 infusion of HIV-specific CAR T cells or use of neutralizing antibodies, may synergize with  
322 HSPC transplantation to achieve post-treatment control<sup>11,69</sup>.

323         The best model predicts that the lack of complete elimination of lymphocytes by TBI  
324 prevents CD4<sup>+</sup>CCR5<sup>-</sup> cells from predominating post-transplant: the rapid expansion of  
325 CD4<sup>+</sup>CCR5<sup>+</sup> and CD8<sup>+</sup> T cells during the first few weeks after HSPC transplantation is most  
326 likely due to lymphopenia-induced proliferation of remaining cells after TBI via a thymus-  
327 independent pathway; the slower expansion of CD4<sup>+</sup>CCR5<sup>-</sup> T cells is due to thymic export of  
328 both transplanted and remaining cells. An important future research question will be to identify  
329 anatomic sites and mechanisms that allow activated CD4<sup>+</sup>CCR5<sup>+</sup> to survive conditioning.

330         A challenge is that more intense conditioning may decrease remaining CD4<sup>+</sup>CCR5<sup>+</sup> cells  
331 but will also lower SHIV specific immunity. We previously demonstrated the link between  
332 disruption of the immune response during transplant and increased magnitude of viral rebound  
333 during treatment interruption<sup>14,51</sup>. Here we predict that the magnitude of the SHIV-specific  
334 immune response is correlated not only with viral load set point, but also with the reduction of  
335 CD4<sup>+</sup>CCR5<sup>+</sup> T cells after ATI. CD4<sup>+</sup>CCR5<sup>+</sup> T cell depletion might also be predictive of the loss  
336 of depletion of virus-specific immunity following conditioning.

337         A final important observation from the model is that viral control may be delayed beyond  
338 the first ten weeks after ATI, and instead occur many months after ATI. Thus, viral load levels  
339 during the initial weeks after ATI may not completely define success (stable ART-free  
340 remission), whereas CD4<sup>+</sup>CCR5<sup>+</sup> T-cell nadir should more strongly correlate with the degree of  
341 depletion of virus-specific immunity. In this sense, minimal CD4<sup>+</sup>CCR5<sup>+</sup> T-cell nadir may  
342 predict post-rebound viral control, if the starting fraction of protected cells is known.



343 Our results are limited by a small sample size of eight animals. For that reason, several  
344 model parameters were assumed to be the same among the population (i.e., without random  
345 effects). However, the number of observations for each animal was large enough to discriminate  
346 among different plausible model candidates. Therefore, we performed projections using only the  
347 individual estimated parameters. Reassuringly, our results align with prior mechanistic studies of  
348 cellular reconstitution after stem cell transplantation<sup>18,26,38,70,71</sup>. Our analysis also suggests that  
349 the majority of reconstituting CD4<sup>+</sup>CCR5<sup>-</sup> T cells do not proliferate and have a slow expansion  
350 that concurs with estimates of thymic export from previous studies<sup>26,70,71</sup>.

351 The interplay between reconstituting HIV susceptible CD4<sup>+</sup> T cells, HIV-resistant CD4<sup>+</sup>  
352 T cells, infected cells, virus-specific immune cells, and replicating virus following autologous,  
353 CCR5-edited HPSC transplantation is extremely complex. Our results illustrate the capabilities  
354 of mathematical models to glean insight from this system and highlight that modeling will be  
355 required to optimize strategies for HIV cure studies, both in the macaque model, as well as in  
356 HIV<sup>+</sup> individuals.

## 357 **Acknowledgements**

358 This study was supported by grants from the National Institutes of Health, National Institute of  
359 Allergy and Infectious Diseases (UM1 AI126623). ERD is supported by the National Center for  
360 Advancing Translational Sciences of the National Institutes of Health under Award Number KL2  
361 TR002317. DBR is supported by a Washington Research Foundation postdoctoral fellowship,  
362 and a CFAR NIA P30 AI027757. The funders had no role in study design, data collection and  
363 analysis, decision to publish, or preparation of the manuscript. The content is solely the  
364 responsibility of the authors and does not necessarily represent the official views of the National  
365 Institutes of Health or the Washington Research Foundation.

366 **Authorship Contributions**

367 E.F.C. and J.T.S. conceived the study. C.W.P. and H.P.K. contributed ideas and data sources for  
368 the project. E.R.D. and D.B.R. contributed ideas for the development of mechanistic  
369 mathematical models. B.T.M. contributed ideas and support for statistical models and analyzes.  
370 E.F.C. assembled data, wrote all code, performed all calculations and derivations, ran the  
371 models, and analyzed output data. J.T.S. and E.F.C. wrote the manuscript with contributions  
372 from all other authors.

373 **Disclosure of Conflicts of Interest**

374 The authors declare no competing financial interests.

375 **Animal Welfare.**

376 The data used in this work were collected in strict accordance with the recommendations in the  
377 *Guide for the Care and Use of Laboratory Animals* of the National Institutes of Health. The  
378 study protocol was approved by the Institutional Animal Care and Use Committees (3235-03) of  
379 the Fred Hutchinson Cancer Research Center and the University of Washington.

380 **Tables**

381 **Table 1. Parameters of the model.** Values are from steady state equations, using population  
 382 estimates from best model fits or assumed from the references as described. When assumed from  
 383 steady state equations, population estimates were used. See **Supp. Materials** for more details.  
 384

| Parameter  | Units          | Description                                                                                             | Value             |                   | Source                                                                                   |
|------------|----------------|---------------------------------------------------------------------------------------------------------|-------------------|-------------------|------------------------------------------------------------------------------------------|
|            |                |                                                                                                         | Control           | Transplant        |                                                                                          |
| $T(t_0)$   | cells          | Number of cells in the transplant product.                                                              | 0                 | $4 \cdot 10^7$    | Fixed, assumed from reference <sup>14</sup> .                                            |
| $P(t_0)$   | cells          | Number of cells in the BM/Thymus at the moment of transplant.                                           | $4 \cdot 10^8$    | 0                 | Control: Computed from the median of steady state equations. Transplant: Fixed, assumed. |
| $N(t_0)$   | cells/ $\mu$ L | Blood CD4 <sup>+</sup> CCR5 <sup>-</sup> T cell concentration at the moment of transplant.              | 1249              | 47                | Control: Computed from the median of steady state equations. Transplant: Fitted.         |
| $S(t_0)$   | cells/ $\mu$ L | Blood CD4 <sup>+</sup> CCR5 <sup>+</sup> T cell concentration at the moment of transplant.              | 115               | 2                 | Control: Computed from the median of steady state equations. Transplant: Fitted.         |
| $M(t_0)$   | cells/ $\mu$ L | Blood CD8 <sup>+</sup> T <sub>N</sub> + T <sub>CM</sub> cell concentration at the moment of transplant. | 305               | 8                 | Control: Computed from the median of steady state equations. Transplant: Fitted.         |
| $E(t_0)$   | cells/ $\mu$ L | Blood CD8 <sup>+</sup> T <sub>EM</sub> cell concentration at the moment of transplant.                  | 935               | 17                | Control: Computed from the median of steady state equations. Transplant: Fitted.         |
| $E_h(t_0)$ | cells/ $\mu$ L | Blood SHIV-specific CD8 <sup>+</sup> T effector cell concentration at the moment of transplant.         | 0                 | 0                 | Control: Computed from steady state equations. Transplant: Assumed.                      |
| $I_p(t_0)$ | cells/ $\mu$ L | Productively infected blood CD4 <sup>+</sup> CCR5 <sup>+</sup> T cell                                   | $2 \cdot 10^{-6}$ | $2 \cdot 10^{-6}$ | Computed from steady state equations.                                                    |

|                                     |                |                                                                                                                            |       |     |                                                   |
|-------------------------------------|----------------|----------------------------------------------------------------------------------------------------------------------------|-------|-----|---------------------------------------------------|
|                                     |                | concentration at the moment of transplant.                                                                                 |       |     |                                                   |
| $I_u(t_0)$                          | cells/ $\mu$ L | Unproductively infected blood CD4 <sup>+</sup> CCR5 <sup>+</sup> T cell concentration at the moment of transplant.         | 0     | 0   | Computed from steady state equations.             |
| $V(t_0)$                            | RNA copies/mL  | Plasma viral load at the moment of transplant.                                                                             | 0.5   | 0.5 | Computed from steady state equations.             |
| $k_e$                               | 1/day          | Homing rate of transplanted cells into the bone marrow.                                                                    | 1     |     | Fixed, assumed from references <sup>72,73</sup> . |
| $\hat{r}_p = r_p - \lambda_p - d_p$ | 1/day          | Renewal rate of stem and progenitor cells in the bone marrow/thymus.                                                       | 0.04  |     | Fitted.                                           |
| $\hat{r}_s = r_s - d_s$             | 1/day          | Proliferation rate of blood CD4 <sup>+</sup> CCR5 <sup>+</sup> T cells.                                                    | 0.14  |     | Fitted.                                           |
| $\hat{r}_m = r_m - \lambda_m - d_m$ | 1/day          | Proliferation rate of blood CD8 <sup>+</sup> T <sub>N</sub> + T <sub>CM</sub> cells.                                       | 0.003 |     | Fitted.                                           |
| $\hat{r}_e = r_e - d_e$             | 1/day          | Proliferation rate of CD8 <sup>+</sup> T <sub>EM</sub> cells.                                                              | 0.09  |     | Fitted.                                           |
| $\hat{d}_n = \lambda_n + d_n$       | 1/day          | Removal rate of blood CD4 <sup>+</sup> CCR5 <sup>-</sup> T cells.                                                          | 0.01  |     | Fitted.                                           |
| $\lambda_p = \lambda_e = \lambda_f$ | 1/day          | Thymic output rate of T cells.                                                                                             | 0.01  |     | Fitted.                                           |
| $\lambda_n$                         | 1/day          | CCR5 upregulation rate in CD4 <sup>+</sup> T cells.                                                                        | 0.004 |     | Fitted.                                           |
| $\lambda_m$                         | 1/day          | Differentiation rate of CD8 <sup>+</sup> T <sub>N</sub> + T <sub>CM</sub> cells to CD8 <sup>+</sup> T <sub>EM</sub> cells. | 0.09  |     | Fitted.                                           |
| $K_p = K \frac{\bar{r}_p}{r_p}$     | cells/ $\mu$ L | Effective carrying capacity of progenitor cells.                                                                           | 1664  |     | Fitted.                                           |
| $K_s = K \frac{\bar{r}_s}{r_s}$     | cells/ $\mu$ L | Effective carrying capacity of CD4 <sup>+</sup> CCR5 <sup>+</sup> T cells.                                                 | 1328  |     | Fitted.                                           |
| $K_m = K \frac{\bar{r}_m}{r_m}$     | cells/ $\mu$ L | Effective carrying capacity of CD8 <sup>+</sup> T <sub>N</sub> + T <sub>CM</sub> cells.                                    | 49    |     | Fitted.                                           |

|                                 |                        |                                                                                          |                   |                                                                    |
|---------------------------------|------------------------|------------------------------------------------------------------------------------------|-------------------|--------------------------------------------------------------------|
| $K_e = K \frac{\bar{r}_e}{r_e}$ | cells/ $\mu$ L         | Effective carrying capacity of CD8 <sup>+</sup> T <sub>EM</sub> cells.                   | 1257              | Fitted.                                                            |
| $\beta$                         | $\mu$ L/<br>copies/day | Infectivity rate.                                                                        | 0.0003            | Fitted.                                                            |
| $\Delta_t$                      | days                   | Time to rebound after ATI.                                                               | 7.5               | Fitted.                                                            |
| $\delta_I$                      | 1/day                  | Death rate of infected CD4 <sup>+</sup> CCR5 <sup>+</sup> T cells.                       | 1                 | Fixed, assumed using estimates from references <sup>74,75</sup> .  |
| $\tau$                          | -                      | Fraction of infected cell that produce infectious virus.                                 | 0.05              | Fixed, assumed from reference <sup>54</sup> .                      |
| $\xi \bar{L}$                   | cells/ $\mu$ L/day     | Number of latent cells that activate per day.                                            | $2 \cdot 10^{-7}$ | Fixed, assumed to have a viral load of ~0.5 copies/mL during cART. |
| $\pi$                           | 1/day                  | Viral production rate.                                                                   | $5 \cdot 10^4$    | Fixed, assumed using estimates from reference <sup>76</sup> .      |
| $\gamma$                        | 1/day                  | Virus clearance rate.                                                                    | 23                | Fixed, assumed using estimates from reference <sup>77</sup> .      |
| $\omega_4$                      | $\mu$ L/cells/day      | SHIV-dependent replenishment of CD4 <sup>+</sup> CCR5 <sup>+</sup> T cells.              | 0.19              | Fitted.                                                            |
| $\omega_8$                      | $\mu$ L/cells/day      | SHIV-dependent proliferation rate of CD8 <sup>+</sup> T cells.                           | 0.002             | Fitted.                                                            |
| $I_{50}$                        | cells/ $\mu$ L         | 50% maximum value of adaptive infected cells, allows bounded growth.                     | 0.20              | Fitted.                                                            |
| $f$                             | -                      | Fraction of SHIV-CD8 <sup>+</sup> -responding cells that become SHIV-specific effectors. | 0.9               | Fixed, assumed from reference <sup>46</sup> .                      |
| $d_h$                           | 1/day                  | Death rate of SHIV-specific effector CD8 <sup>+</sup> T cells.                           | 0.05              | Fitted.                                                            |
| $\frac{1}{\theta}$              | $\mu$ L/cells          | 50% maximum value of SHIV-specific immune cells to block virus production.               | 1                 | Fixed.                                                             |

## 386 References

- 387 1. Chun T-W, Carruth L, Finzi D, et al. Quantification of latent tissue reservoirs and total  
388 body viral load in HIV-1 infection. *Nature*. 1997;387(6629):183.
- 389 2. Chun T-W, Finzi D, Margolick J, Chadwick K, Schwartz D, Siliciano RF. In vivo fate of  
390 HIV-1-infected T cells: Quantitative analysis of the transition to stable latency. *Nature Medicine*.  
391 1995;1(12):1284-1290.
- 392 3. Finzi D, Hermankova M, Pierson T, et al. Identification of a Reservoir for HIV-1 in  
393 Patients on Highly Active Antiretroviral Therapy. *Science*. 1997;278(5341):1295-1300.
- 394 4. Allers K, Hütter G, Hofmann J, et al. Evidence for the cure of HIV infection by  
395 CCR5 $\Delta$ 32/ $\Delta$ 32 stem cell transplantation. *Blood*. 2011;117(10):2791-2799.
- 396 5. Hütter G, Nowak D, Mossner M, et al. Long-Term Control of HIV by CCR5  
397 Delta32/Delta32 Stem-Cell Transplantation. *New England Journal of Medicine*.  
398 2009;360(7):692-698.
- 399 6. Gupta RK, Abdul-jawad S, McCoy LE, et al. HIV-1 remission following CCR5 $\Delta$ 32/ $\Delta$ 32  
400 haematopoietic stem-cell transplantation. *Nature*. 2019:1.
- 401 7. Henrich TJ, Hanhauser E, Harrison LJ, et al. CCR5- $\Delta$ 32 Heterozygosity, HIV-1  
402 Reservoir Size, and Lymphocyte Activation in Individuals Receiving Long-term Suppressive  
403 Antiretroviral Therapy. *The Journal of Infectious Diseases*. 2016;213(5):766-770.
- 404 8. Henrich TJ, Hanhauser E, Marty FM, et al. Antiretroviral-Free HIV-1 Remission and  
405 Viral Rebound After Allogeneic Stem Cell Transplantation: Report of 2 Cases. *Annals of*  
406 *Internal Medicine*. 2014;161(5):319.
- 407 9. Henrich TJ, Hu Z, Li JZ, et al. Long-Term Reduction in Peripheral Blood HIV Type 1  
408 Reservoirs Following Reduced-Intensity Conditioning Allogeneic Stem Cell Transplantation.  
409 *The Journal of Infectious Diseases*. 2013;207(11):1694-1702.
- 410 10. Salgado M, Kwon M, Gálvez C, et al. Mechanisms That Contribute to a Profound  
411 Reduction of the HIV-1 Reservoir After Allogeneic Stem Cell Transplant. *Annals of Internal*  
412 *Medicine*. 2018.
- 413 11. Haworth KG, Peterson CW, Kiem H-P. CCR5-edited gene therapies for HIV cure:  
414 Closing the door to viral entry. *Cytotherapy*. 2017;19(11):1325-1338.
- 415 12. Tebas P, Stein D, Tang WW, et al. Gene Editing of CCR5 in Autologous CD4 T Cells of  
416 Persons Infected with HIV. *New England Journal of Medicine*. 2014;370(10):901-910.
- 417 13. Peterson CW, Wang J, Norman KK, et al. Long-term multilineage engraftment of  
418 autologous genome-edited hematopoietic stem cells in nonhuman primates. *Blood*.  
419 2016;127(20):2416-2426.
- 420 14. Peterson CW, Benne C, Polacino P, et al. Loss of immune homeostasis dictates SHIV  
421 rebound after stem-cell transplantation. *JCI Insight*. 2017;2(4).
- 422 15. Peterson CW, Haworth KG, Polacino P, et al. Lack of viral control and development of  
423 combination antiretroviral therapy escape mutations in macaques after bone marrow  
424 transplantation. *Aids*. 2015;29(13):1597-1606.
- 425 16. Peterson CW, Wang J, Deleage C, et al. Differential impact of transplantation on  
426 peripheral and tissue-associated viral reservoirs: Implications for HIV gene therapy. *PLOS*  
427 *Pathogens*. 2018;14(4):e1006956.
- 428 17. Ho O, Larsen K, Polacino P, et al. Pathogenic infection of *Macaca nemestrina* with a  
429 CCR5-tropic subtype-C simian-human immunodeficiency virus. *Retrovirology*. 2009;6(1):65.

- 430 18. Jameson SC. Maintaining the norm: T-cell homeostasis. *Nature Reviews Immunology*.  
431 2002;2(8):547-556.
- 432 19. Mehr R, Perelson AS. Blind T-cell homeostasis and the CD4/CD8 ratio in the thymus and  
433 peripheral blood. *Journal of Acquired Immune Deficiency Syndromes and Human Retrovirology*:  
434 *Official Publication of the International Retrovirology Association*. 1997;14(5):387-398.
- 435 20. Margolick JB, Donnenberg AD. T-cell homeostasis in HIV-1 infection. *Seminars in*  
436 *Immunology*. 1997;9(6):381-388.
- 437 21. Schluns KS, Williams K, Ma A, Zheng XX, Lefrançois L. Cutting Edge: Requirement for  
438 IL-15 in the Generation of Primary and Memory Antigen-Specific CD8 T Cells. *The Journal of*  
439 *Immunology*. 2002;168(10):4827-4831.
- 440 22. Schluns KS, Kieper WC, Jameson SC, Lefrançois L. Interleukin-7 mediates the  
441 homeostasis of naïve and memory CD8 T cells *in vivo*. *Nature Immunology*. 2000;1(5):426-432.
- 442 23. Goldrath AW, Luckey CJ, Park R, Benoist C, Mathis D. The molecular program induced  
443 in T cells undergoing homeostatic proliferation. *Proceedings of the National Academy of*  
444 *Sciences*. 2004;101(48):16885-16890.
- 445 24. Voehringer D, Liang H-E, Locksley RM. Homeostasis and Effector Function of  
446 Lymphopenia-Induced “Memory-Like” T Cells in Constitutively T Cell-Depleted Mice. *The*  
447 *Journal of Immunology*. 2008;180(7):4742-4753.
- 448 25. Boyman O, Létourneau S, Krieg C, Sprent J. Homeostatic proliferation and survival of  
449 naïve and memory T cells. *European Journal of Immunology*. 2009;39(8):2088-2094.
- 450 26. Douek DC, Vescio RA, Betts MR, et al. Assessment of thymic output in adults after  
451 haematopoietic stemcell transplantation and prediction of T-cell reconstitution. *The Lancet*.  
452 2000;355(9218):1875-1881.
- 453 27. Douek DC, McFarland RD, Keiser PH, et al. Changes in thymic function with age and  
454 during the treatment of HIV infection. *Nature*. 1998;396(6712):690-695.
- 455 28. Bender J, Mitchell T, Kappler J, Marrack P. Cd4+ T Cell Division in Irradiated Mice  
456 Requires Peptides Distinct from Those Responsible for Thymic Selection. *Journal of*  
457 *Experimental Medicine*. 1999;190(3):367-374.
- 458 29. Kieper WC, Jameson SC. Homeostatic expansion and phenotypic conversion of naïve T  
459 cells in response to self peptide/MHC ligands. *Proceedings of the National Academy of Sciences*.  
460 1999;96(23):13306-13311.
- 461 30. Sallusto F, Geginat J, Lanzavecchia A. Central Memory and Effector Memory T Cell  
462 Subsets: Function, Generation, and Maintenance. *Annual Review of Immunology*.  
463 2004;22(1):745-763.
- 464 31. Saout CL, Mennechet S, Taylor N, Hernandez J. Memory-like CD8+ and CD4+ T cells  
465 cooperate to break peripheral tolerance under lymphopenic conditions. *Proceedings of the*  
466 *National Academy of Sciences*. 2008;105(49):19414-19419.
- 467 32. Sprent J, Surh CD. Normal T cell homeostasis: the conversion of naive cells into  
468 memory-phenotype cells. *Nature Immunology*. 2011;12(6):478-484.
- 469 33. Takeda S, Rodewald H-R, Arakawa H, Bluethmann H, Shimizu T. MHC Class II  
470 Molecules Are Not Required for Survival of Newly Generated CD4+ T Cells, but Affect Their  
471 Long-Term Life Span. *Immunity*. 1996;5(3):217-228.
- 472 34. Tanchot C, Lemonnier FA, Pérarnau B, Freitas AA, Rocha B. Differential Requirements  
473 for Survival and Proliferation of CD8 Naïve or Memory T Cells. *Science*. 1997;276(5321):2057-  
474 2062.

- 475 35. Fry TJ, Mackall CL. Interleukin-7: master regulator of peripheral T-cell homeostasis?  
476 *Trends in Immunology*. 2001;22(10):564-571.
- 477 36. Tan JT, Dudl E, LeRoy E, et al. IL-7 is critical for homeostatic proliferation and survival  
478 of naïve T cells. *Proceedings of the National Academy of Sciences*. 2001;98(15):8732-8737.
- 479 37. Yamaki S, Ine S, Kawabe T, et al. OX40 and IL-7 play synergistic roles in the  
480 homeostatic proliferation of effector memory CD4+ T cells. *European Journal of Immunology*.  
481 2014;44(10):3015-3025.
- 482 38. Guillaume T, Rubinstein DB, Symann M. Immune Reconstitution and Immunotherapy  
483 After Autologous Hematopoietic Stem Cell Transplantation. *Blood*. 1998;92(5):1471-1490.
- 484 39. Spits H. Development of  $\alpha\beta$  T cells in the human thymus. *Nature Reviews Immunology*.  
485 2002;2(10):760.
- 486 40. Berkowitz RD, Beckerman KP, Schall TJ, McCune JM. CXCR4 and CCR5 Expression  
487 Delineates Targets for HIV-1 Disruption of T Cell Differentiation. *The Journal of Immunology*.  
488 1998;161(7):3702-3710.
- 489 41. Bleul CC, Wu L, Hoxie JA, Springer TA, Mackay CR. The HIV coreceptors CXCR4 and  
490 CCR5 are differentially expressed and regulated on human T lymphocytes. *Proceedings of the*  
491 *National Academy of Sciences*. 1997;94(5):1925-1930.
- 492 42. Zaitseva MB, Lee S, Rabin RL, et al. CXCR4 and CCR5 on Human Thymocytes:  
493 Biological Function and Role in HIV-1 Infection. *The Journal of Immunology*.  
494 1998;161(6):3103-3113.
- 495 43. Buchholz VR, Flossdorf M, Hensel I, et al. Disparate Individual Fates Compose Robust  
496 CD8+ T Cell Immunity. *Science*. 2013;340(6132):630-635.
- 497 44. Farber DL, Yudanin NA, Restifo NP. Human memory T cells: generation,  
498 compartmentalization and homeostasis. *Nature Reviews Immunology*. 2014;14(1):24-35.
- 499 45. Kaech SM, Wherry EJ, Ahmed R. Effector and memory T-cell differentiation:  
500 implications for vaccine development. *Nature Reviews Immunology*. 2002;2(4):251-262.
- 501 46. Borducchi EN, Cabral C, Stephenson KE, et al. Ad26/MVA therapeutic vaccination with  
502 TLR7 stimulation in SIV-infected rhesus monkeys. *Nature*. 2016;540(7632):284.
- 503 47. De Boer RJ. Understanding the Failure of CD8+ T-Cell Vaccination against  
504 Simian/Human Immunodeficiency Virus. *Journal of Virology*. 2007;81(6):2838-2848.
- 505 48. Hill AL, Rosenbloom DIS, Nowak MA, Siliciano RF. Insight into treatment of HIV  
506 infection from viral dynamics models. *Immunological Reviews*. 2018;285(1):9-25.
- 507 49. Perelson AS. Modelling viral and immune system dynamics. *Nature Reviews*  
508 *Immunology*. 2002;2(1):28-36.
- 509 50. Perelson AS, Essunger P, Cao Y, et al. Decay characteristics of HIV-1-infected  
510 compartments during combination therapy. *Nature*. 1997;387(6629):188.
- 511 51. Reeves DB, Peterson CW, Kiem H-P, Schiffer JT. Autologous Stem Cell Transplantation  
512 Disrupts Adaptive Immune Responses during Rebound Simian/Human Immunodeficiency Virus  
513 Viremia. *Journal of Virology*. 2017;91(13):e00095-00017.
- 514 52. Wodarz D, Garg N, Komarova NL, et al. Kinetics of CLL cells in tissues and blood  
515 during therapy with the BTK inhibitor ibrutinib. *Blood*. 2014;123(26):4132-4135.
- 516 53. Wodarz D, Nowak MA. Specific therapy regimes could lead to long-term immunological  
517 control of HIV. *Proceedings of the National Academy of Sciences*. 1999;96(25):14464-14469.
- 518 54. Doitsh G, Cavrois M, Lassen KG, et al. Abortive HIV Infection Mediates CD4 T Cell  
519 Depletion and Inflammation in Human Lymphoid Tissue. *Cell*. 2010;143(5):789-801.



- 520 55. Matrajt L, Younan PM, Kiem H-P, Schiffer JT. The Majority of CD4+ T-Cell Depletion  
521 during Acute Simian-Human Immunodeficiency Virus SHIV89.6P Infection Occurs in  
522 Uninfected Cells. *Journal of Virology*. 2014;88(6):3202-3212.
- 523 56. Lavielle M. Mixed Effects Models for the Population Approach: Models, Tasks, Methods  
524 and Tools (ed 1 edition). Boca Raton: Chapman and Hall/CRC; 2014.
- 525 57. Burnham KP, Anderson DR. Model Selection and Multimodel Inference: A Practical  
526 Information-Theoretic Approach (ed 2). New York: Springer-Verlag; 2002.
- 527 58. Elemans M, Basatena N-KSa, Klatt NR, Gkekas C, Silvestri G, Asquith B. Why Don't  
528 CD8+ T Cells Reduce the Lifespan of SIV-Infected Cells In Vivo? *PLOS Computational*  
529 *Biology*. 2011;7(9):e1002200.
- 530 59. Klatt NR, Shudo E, Ortiz AM, et al. CD8+ Lymphocytes Control Viral Replication in  
531 SIVmac239-Infected Rhesus Macaques without Decreasing the Lifespan of Productively  
532 Infected Cells. *PLOS Pathogens*. 2010;6(1):e1000747.
- 533 60. Wong JK, Strain MC, Porrata R, et al. In Vivo CD8+ T-Cell Suppression of SIV Viremia  
534 Is Not Mediated by CTL Clearance of Productively Infected Cells. *PLOS Pathogens*.  
535 2010;6(1):e1000748.
- 536 61. Shridhar V, Chen Y, Gupta P. The CD8 Antiviral Factor (CAF) can suppress HIV-1  
537 transcription from the Long Terminal Repeat (LTR) promoter in the absence of elements  
538 upstream of the CATATAA box. *Virology Journal*. 2014;11(1):130.
- 539 62. Blazek D, Teque F, Mackewicz C, Peterlin M, Levy JA. The CD8+ cell non-cytotoxic  
540 antiviral response affects RNA polymerase II-mediated human immunodeficiency virus  
541 transcription in infected CD4+ cells. *Journal of General Virology*. 2016;97(1):220-224.
- 542 63. Zhang L, Yu W, He T, et al. Contribution of Human  $\alpha$ -Defensin 1, 2, and 3 to the Anti-  
543 HIV-1 Activity of CD8 Antiviral Factor. *Science*. 2002;298(5595):995-1000.
- 544 64. Levy JA, Mackewicz CE, Barker E. Controlling HIV pathogenesis: the role of the  
545 noncytotoxic anti-HIV response of CD8+ T cells. *Immunology Today*. 1996;17(5):217-224.
- 546 65. A. OA, J. PL. CD4+ T cell depletion in HIV infection: mechanisms of immunological  
547 failure. *Immunological Reviews*. 2013;254(1):54-64.
- 548 66. Douek DC, Picker LJ, Koup RA. T Cell Dynamics in HIV-1 Infection. *Annual Review of*  
549 *Immunology*. 2003;21(1):265-304.
- 550 67. Okoye A, Meier-Schellersheim M, Brenchley JM, et al. Progressive CD4+ central-  
551 memory T cell decline results in CD4+ effector-memory insufficiency and overt disease in  
552 chronic SIV infection. *Journal of Experimental Medicine*. 2007;204(9):2171-2185.
- 553 68. Okoye AA, Rohankhedkar M, Abana C, et al. Naive T cells are dispensable for memory  
554 CD4+ T cell homeostasis in progressive simian immunodeficiency virus infection. *Journal of*  
555 *Experimental Medicine*. 2012;209(4):641-651.
- 556 69. Zhen A, Peterson CW, Carrillo MA, et al. Long-term persistence and function of  
557 hematopoietic stem cell-derived chimeric antigen receptor T cells in a nonhuman primate model  
558 of HIV/AIDS. *PLOS Pathogens*. 2017;13(12):e1006753.
- 559 70. Krenger W, Blazar BR, Holländer GA. Thymic T-cell development in allogeneic stem  
560 cell transplantation. *Blood*. 2011;117(25):6768-6776.
- 561 71. Roux E, Dumont-Girard F, Starobinski M, et al. Recovery of immune reactivity after T-  
562 cell-depleted bone marrow transplantation depends on thymic activity. *Blood*. 2000;96(6):2299-  
563 2303.
- 564 72. Lapidot T, Dar A, Kollet O. How do stem cells find their way home? *Blood*.  
565 2005;106(6):1901-1910.

- 566 73. Chute J. Stem cell homing. *Current Opinion in Hematology*. 2006;13(6):399-406.  
567 74. Markowitz M, Louie M, Hurley A, et al. A Novel Antiviral Intervention Results in More  
568 Accurate Assessment of Human Immunodeficiency Virus Type 1 Replication Dynamics and T-  
569 Cell Decay In Vivo. *Journal of Virology*. 2003;77(8):5037-5038.  
570 75. Cardozo EF, Andrade A, Mellors JW, Kuritzkes DR, Perelson AS, Ribeiro RM.  
571 Treatment with integrase inhibitor suggests a new interpretation of HIV RNA decay curves that  
572 reveals a subset of cells with slow integration. *PLOS Pathogens*. 2017;13(7):e1006478.  
573 76. Chen HY, Mascio MD, Perelson AS, Ho DD, Zhang L. Determination of virus burst size  
574 in vivo using a single-cycle SIV in rhesus macaques. *Proceedings of the National Academy of*  
575 *Sciences*. 2007;104(48):19079-19084.  
576 77. Ramratnam B, Bonhoeffer S, Binley J, et al. Rapid production and clearance of HIV-1  
577 and hepatitis C virus assessed by large volume plasma apheresis. *The Lancet*.  
578 1999;354(9192):1782-1785.  
579

## 580 **Figure Legends**

581 **Figure 1. Study design and mathematical modeling. A.** Four animals were infected with  
582 SHIV, suppressed with cART and then underwent TBI/HSPC transplantation without editing of  
583 CCR5 (Transplant group). A control group of four animals did not receive TBI or HSPC  
584 transplantation. Both groups underwent ATI approximately one year after cART initiation. **B.**  
585 Mathematical modeling approach. **C.** Mathematical model for T cell reconstitution. Each circle  
586 represents a cell compartment:  $T$  represents the HSPCs from the transplant;  $P$ , the progenitor  
587 cells in bone marrow (BM) and Thymus;  $S$  and  $N$ ,  $CD4^+CCR5^+$  and  $CD4^+CCR5^-$  T cells,  
588 respectively;  $M$  and  $E$ , the  $CD8^+$  T cells with naïve and central memory phenotypes, and effector  
589 memory phenotypes, respectively. **D.** Mathematical model for virus dynamics. We adapted the  
590 previous model by including the following assumptions. Susceptible cells,  $S$ , are infected by the  
591 virus,  $V$ .  $I_p$  and  $I_u$  represent a fraction  $\tau$  of the infected cells produce virus,  $I_p$ , and the other  
592 fraction become unproductively infected,  $I_u$ . Total  $CD4^+CCR5^+$  T cell count is given by the sum  
593 of  $S$ ,  $I_p$  and  $I_u$ . All infected cells die at rate  $\delta_I$ .  $I_p$  cells arise from activation of latently infected  
594 cells at rate  $\xi \bar{L}$ , and produce virus at a rate  $\pi$ , that is cleared at rate  $\gamma$ .  $CD8^+$   $M$  cells proliferate in  
595 the presence of infection with rate  $\omega_8$  from which a fraction  $f$  become SHIV-specific  $CD8^+$   
596 effector T cells,  $E_h$ , that are removed at a rate  $d_h$ . These effector cells reduce virus production or  
597 infectivity by  $1/(1+\theta E_h)$ , or  $1/(1+\phi E_h)$ , respectively. Non-susceptible  $CD4^+$  T cells upregulate  
598 CCR5 in the presence of infection and replenish the susceptible pool with rate  $\omega_4$ . **E.** Schematic  
599 of the extended mathematical model that includes CCR5-edited, protected cells. Protected cells  
600 from transplant:  $T_p$ , protected progenitor cells in bone marrow/thymus:  $P_p$ , and protected  
601  $CD4^+CCR5^-$  T cells:  $N_p$  are included. The initial fraction of protected cells is represented by the  
602 parameter  $f_p$ .

603

604 **Figure 2. CD4<sup>+</sup> and CD8<sup>+</sup> T cell dynamics post-transplantation, pre-ATI.** Range of blood **A.**

605 CD4<sup>+</sup> and **B.** CD8<sup>+</sup> T cell counts using all data points for the period before ATI in control

606 animals (p-value calculated with a paired t-test for averaged measurements post-transplant). **C.**

607 Distribution of the growth rate estimates of CD4<sup>+</sup>CCR5<sup>+</sup>, CD4<sup>+</sup>CCR5<sup>-</sup>, and CD8<sup>+</sup> T cells using

608 all data points from time of transplant until their levels reached set point in transplanted animals

609 (p-value calculated using a paired t-test). We assumed set point as the data point after which the

610 sum of consecutive changes from the moment of transplant in T cell counts was smaller or equal

611 to zero. **D.** Empirical data for peripheral subset counts (colored data points) and best fits of the

612 model (solid lines) to all blood T cell subsets before ATI for all animals in the transplant group.

613 Each row is one animal.

614

615 **Figure 3. Model predictions of the CD4<sup>+</sup>CCR5<sup>+</sup> T cell turnover.** Model prediction of the total

616 concentration of CD4<sup>+</sup>CCR5<sup>+</sup> T new cells generated by proliferation (solid line) and the

617 concentration generated by up-regulation of CCR5 (dashed line) over time using the best

618 estimates for all 4 transplanted animals.

619

620 **Figure 4. Plasma viral load and CD4<sup>+</sup> T cell kinetics after ATI.** **A-D:** Distributions of **A.** peak

621 viral load post-ATI, **B.** viral load at endpoint necropsy, **C.** CD4<sup>+</sup>CCR5<sup>+</sup> T-cell normalized nadir

622 post-ATI relative to the CCR5 concentration at ATI, **D.** CD4<sup>+</sup>CCR5<sup>-</sup> T-cell nadir post-ATI. P-

623 values were calculated using Mann-Whitney test. **E.** Best fits of the model (black lines) to SHIV

624 RNA, and blood CD4<sup>+</sup>CCR5<sup>+</sup> T, CD4<sup>+</sup>CCR5<sup>-</sup> T, total CD8<sup>+</sup> T, CD8<sup>+</sup> T<sub>EM</sub>, and CD8<sup>+</sup> T<sub>n</sub> and T<sub>CM</sub>

625 cell counts (colored data points) for all 4 transplanted animals.

626

627 **Figure 5. Loss of SHIV-specific CD8 response after transplantation.** Scatterplots of the  
628 SHIV-dependent CD8 proliferation rate ( $\omega_8$ ) vs. **A.**  $CD4^+CCR5^+$  normalized nadir post-ATI  
629 relative to the CCR5 concentration at ATI, and **B.** final observed viral load from all animals; (p-  
630 values calculated using Spearman's rank test). **C-D:** Individual parameter estimates of **C.** the  
631 SHIV-dependent CD8 proliferation rate ( $\omega_8$ ) and **D.** the time of rebound after ATI (see text).  
632 Blue: control, and red: transplant groups (p-values calculated by Mann-Whitney test).

633

634 **Figure 6. Model predictions for post-rebound viral control after CCR5 gene-edited HSPC**  
635 **transplant.** **A.** Predictions for plasma viral load post-ATI using the adapted model for varying  
636 values of  $f_p$  (using parameter estimates from animal Z09144). **B-E.** Predictions for plasma viral  
637 load (heat-map color) for each animal at a given time post-ATI (x-axis) and a given  $f_p$  (y-axis).

638

639 **Figure 7.  $CD4^+CCR5^+$  T cell nadir as a predictor for necessary minimum initial fraction of**  
640 **protected cells to achieve post ATI control.** **A.** Predictions for the normalized  $CD4^+CCR5^+$  T  
641 cell counts relative to their concentration at ATI using the adapted model for varying values of  $f_p$   
642 (using parameter estimates from animal Z09144). **B.** Predicted  $CD4^+CCR5^+$  T cell normalized  
643 nadir during the first 10 weeks after ATI for the minimum fraction of protected cells required to  
644 obtain post-rebound control after 2 years using parameter estimates for each animal. Dashed line  
645 describes a linear regression of the computed minimum fraction of protected cells ( $f_p$ ) and the  
646 CCR5 normalized nadir.

647

648 Predicted maximum decrease of CD4<sup>+</sup>CCR5<sup>+</sup> T cells during the first 10 weeks after ATI for the  
649 minimum fraction of protected cells required to obtain post-rebound control after 2 years using  
650 parameter estimates for each animal

651

652

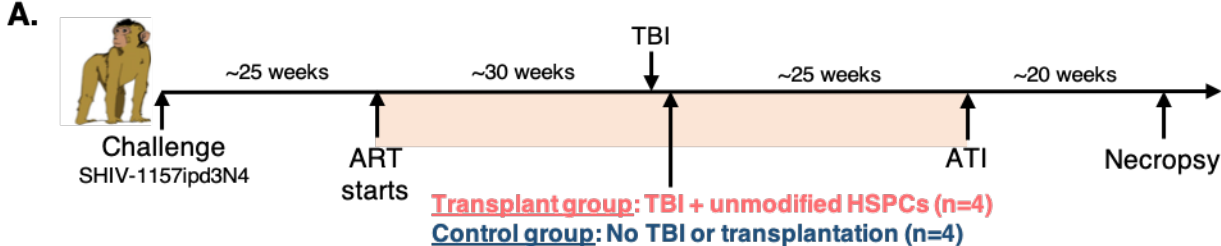

**B.**

| Objective                                                                         | Model   |
|-----------------------------------------------------------------------------------|---------|
| 1. Model T cell subset recovery following autologous HCT                          | Fig. 1C |
| 2. Model Viral and T-cell dynamics post-ATI                                       | Fig. 1D |
| 3. Model the impact of varying fractions of protected cells transplanted post-ATI | Fig. 1E |

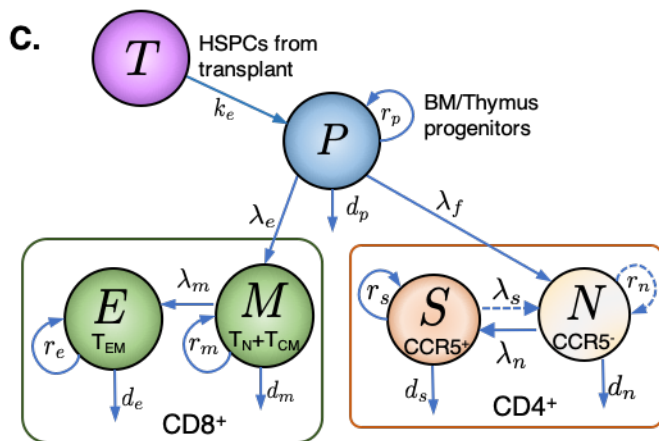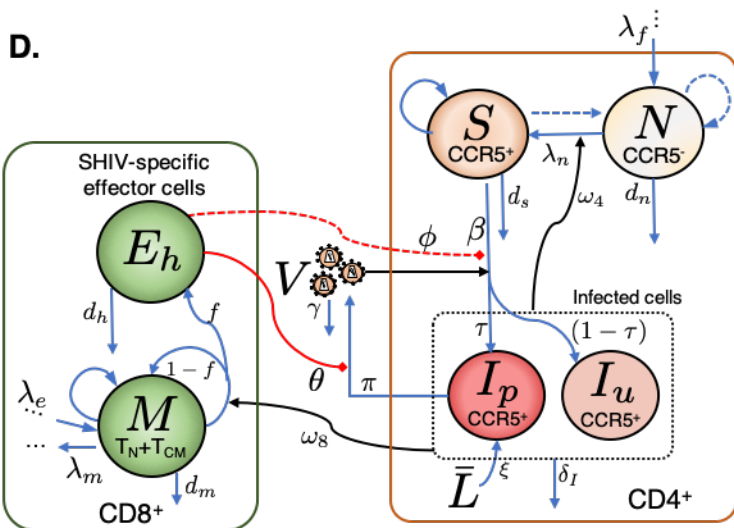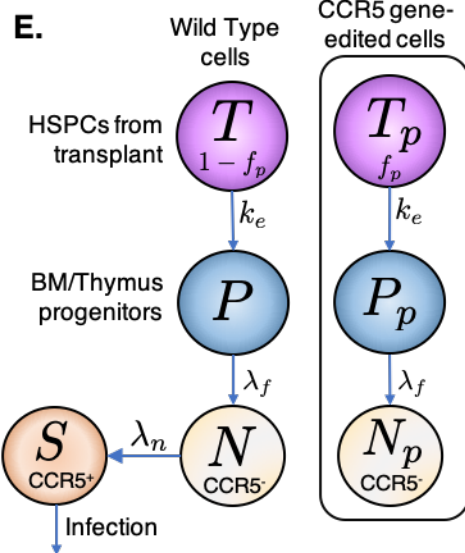

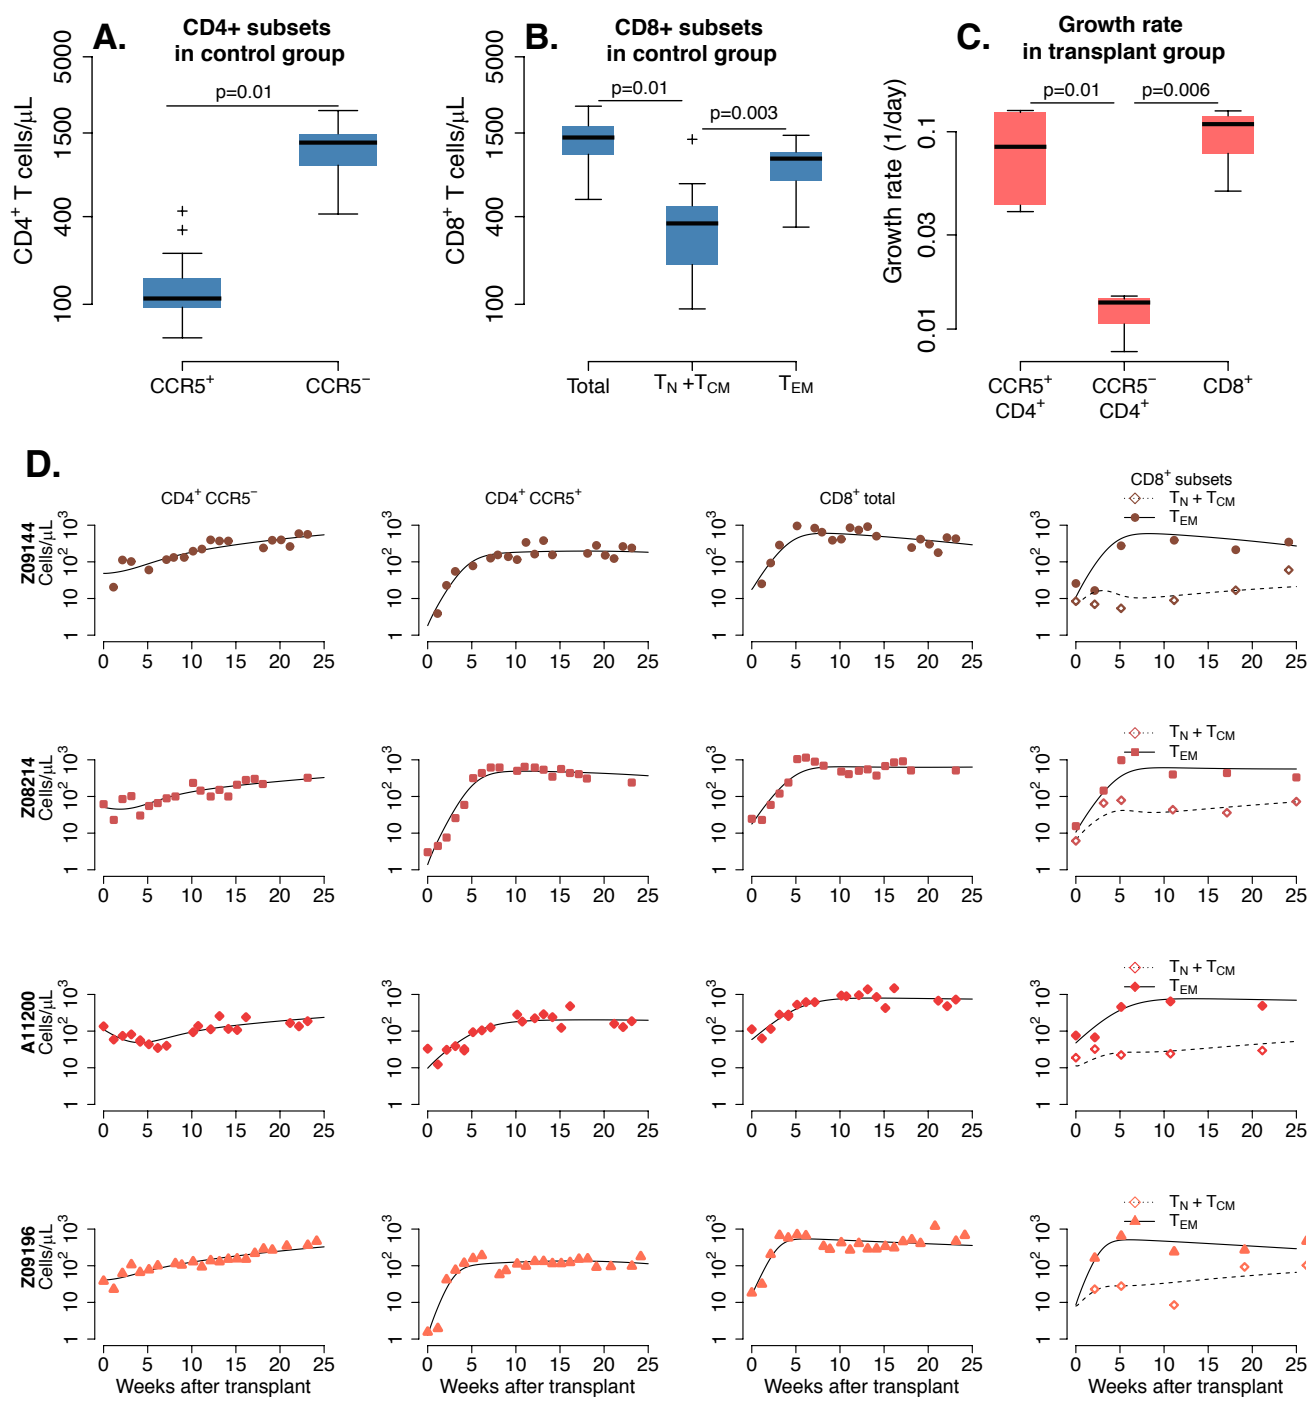



# Predicted CD4+CCR5+ T cell turnover

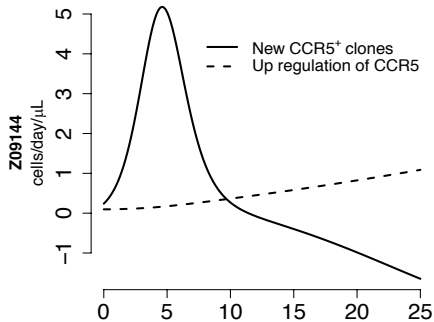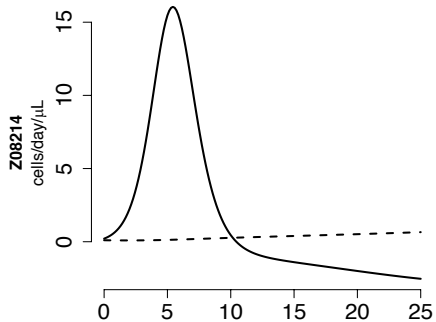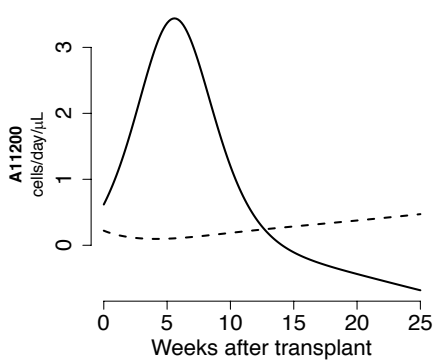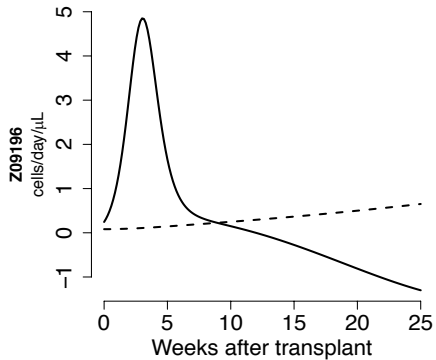

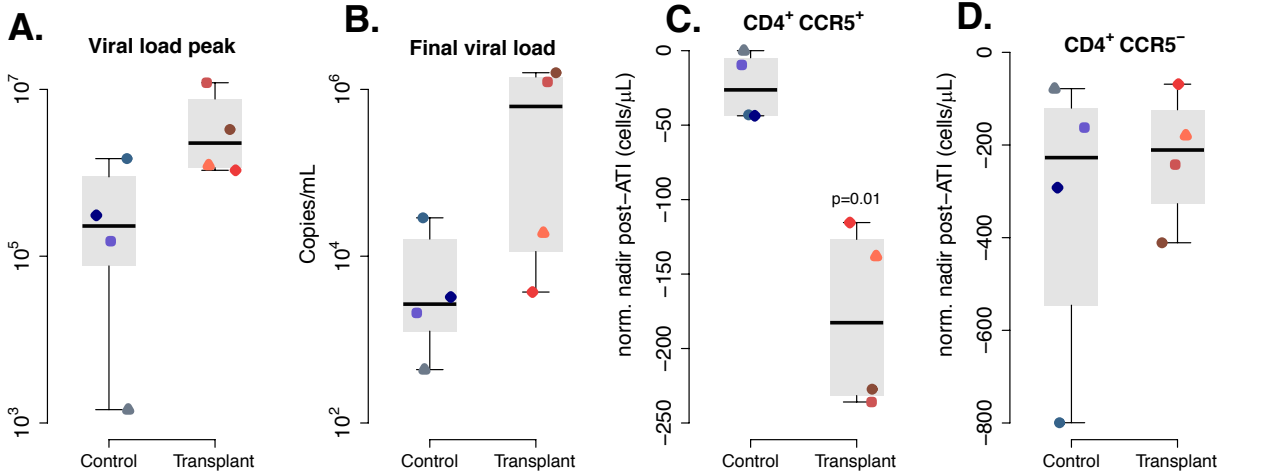

**E.**

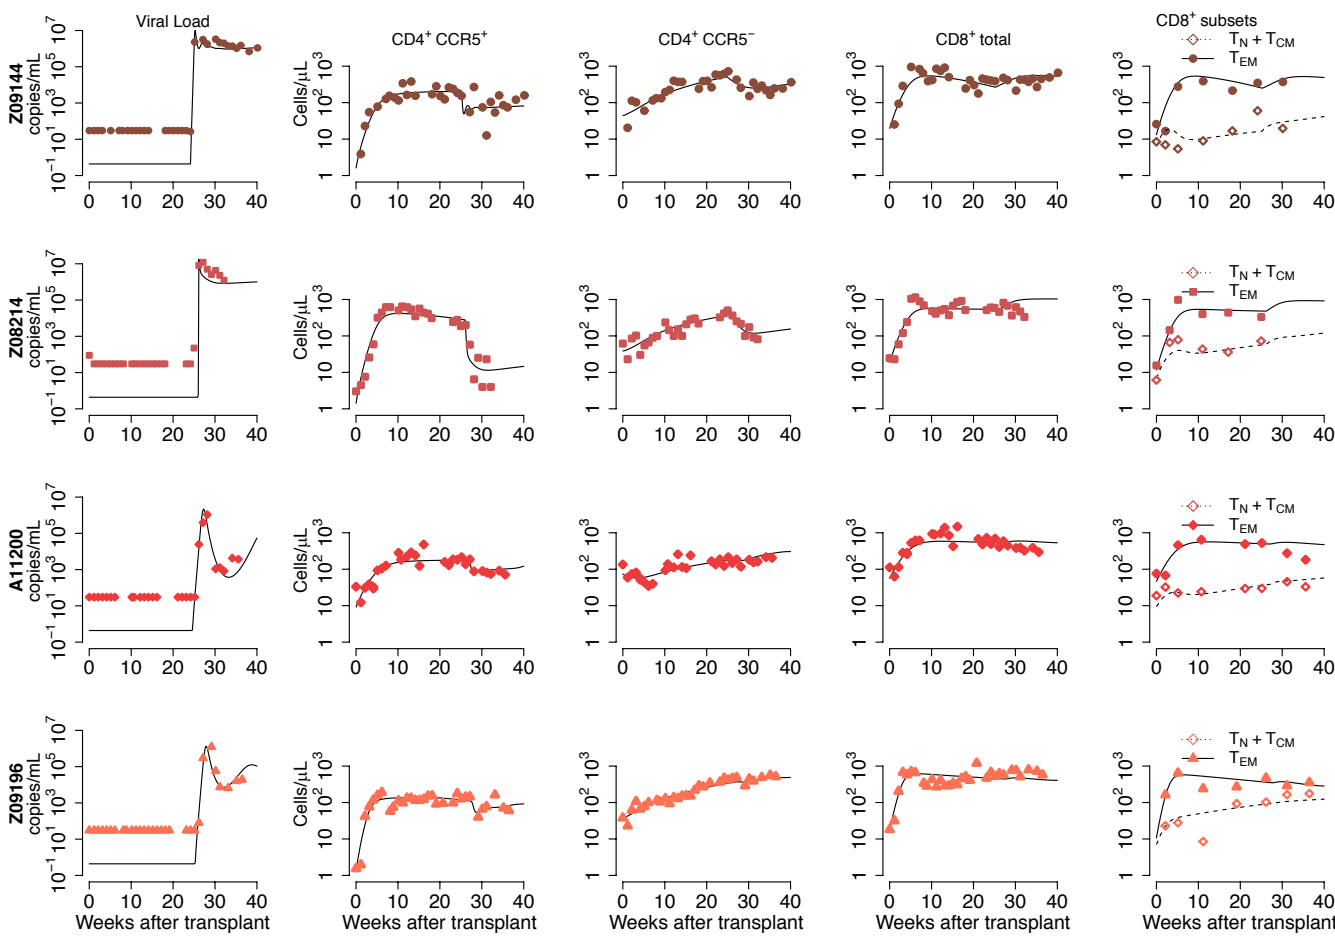

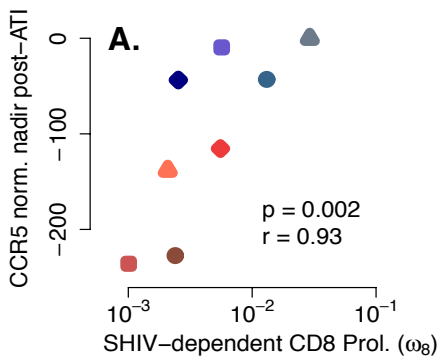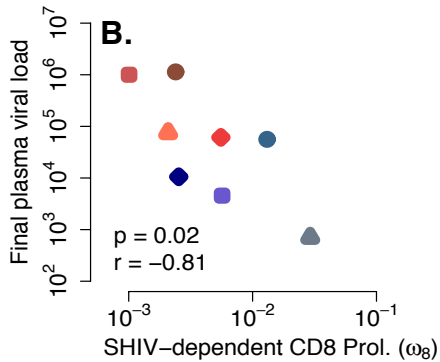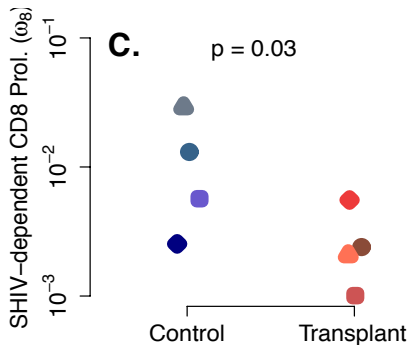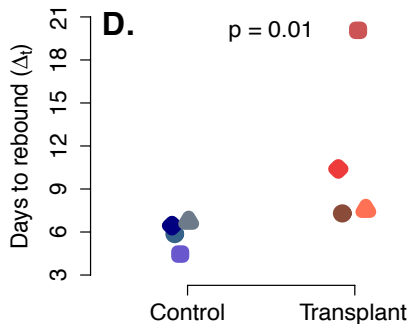

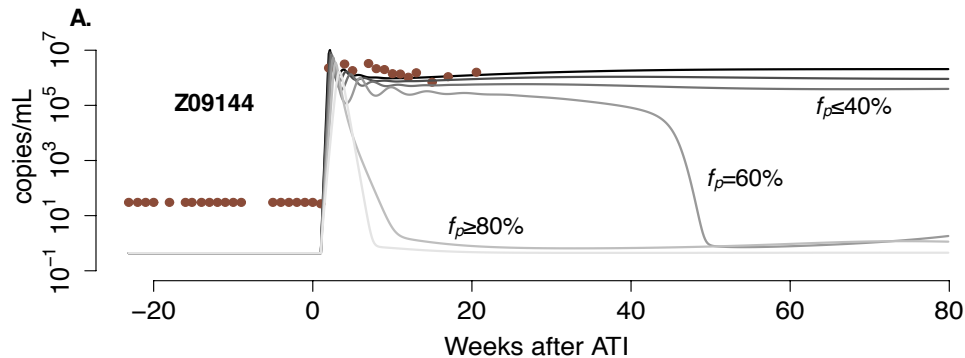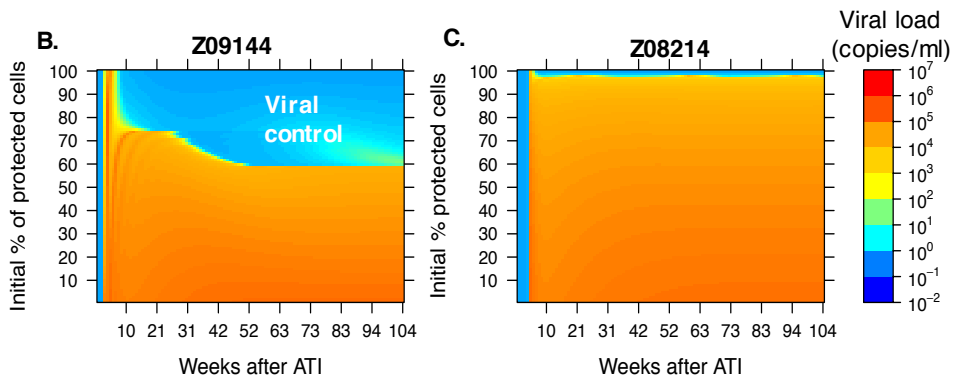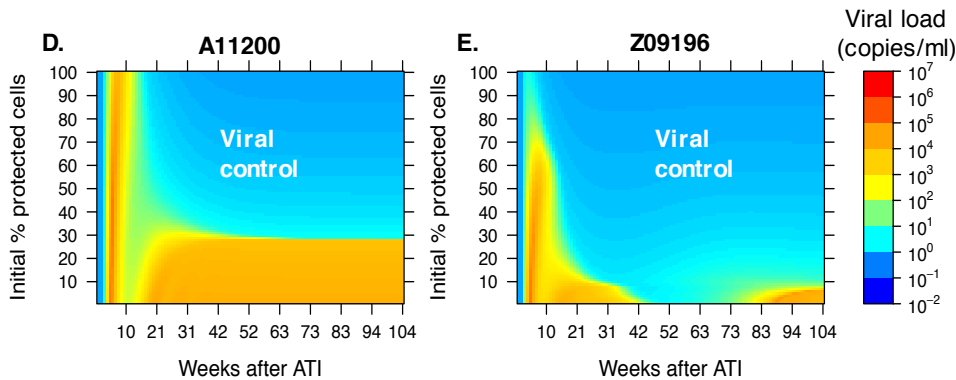

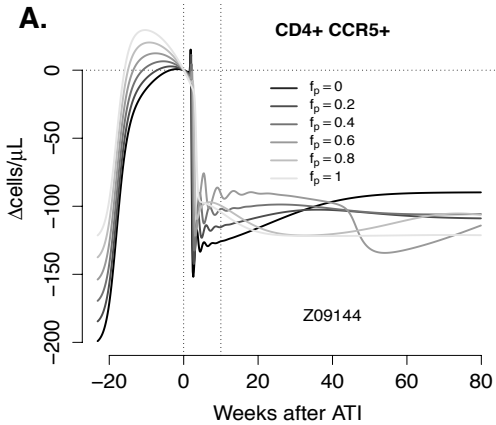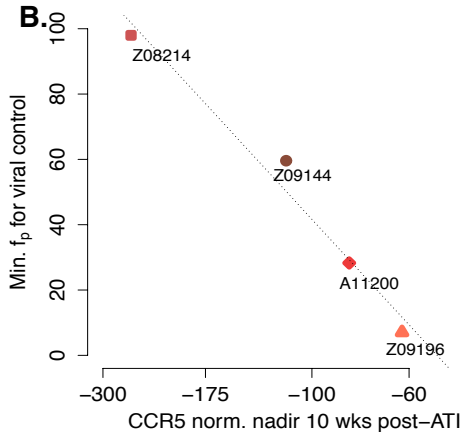

Source: http://biorxiv.org/content/10.1101/629717v2.full.pdf
