1 **Thresholds for post-rebound viral control after CCR5 gene-edited autologous**  
2 **hematopoietic cell transplantation**

3

4

5 E. Fabian Cardozo<sup>1</sup>, Elizabeth R. Duke<sup>1,3</sup>, Christopher W. Peterson<sup>2,3</sup>, Daniel B. Reeves<sup>1</sup>, Bryan  
6 T Mayer<sup>1</sup>, Hans-Peter Kiem<sup>2,3,4</sup>, Joshua T. Schiffer<sup>1,2,3,\*</sup>

7

8

9 <sup>1</sup>Vaccine and Infectious Disease Division,

10 <sup>2</sup>Clinical Research Division, Fred Hutchinson Cancer Research Center, Seattle, WA, USA;

11 <sup>3</sup>Department of Medicine and

12 <sup>4</sup>Department of Pathology, University of Washington, Seattle, WA, USA.

13

14

15 \*Corresponding Author

16

17

18 Short title: Post-rebound SHIV control after  $\Delta$ CCR5 HSPC transplantation

19 **Abstract (248/250 words)**

20 Two recent cases of HIV cure/stable remission following allogeneic stem cell  
21 transplantation are difficult to reproduce because of inherent toxicities and the rarity of donors  
22 homozygous for the CCR5 $\Delta$ 32 deletion. One approach to overcome these barriers and improve  
23 safety is the use of autologous, CCR5 gene-edited hematopoietic stem and progenitor cell  
24 (HSPC) products. Unlike allogeneic transplantation, in which the frequency of CCR5 $\Delta$ 32 donor  
25 cells approaches 100%, the CCR5 gene can currently only be edited in a fraction of autologous  
26 HSPCs. Therefore, we sought to determine the minimum fraction required for post-rebound viral  
27 control using mathematical modeling. We analyzed data from eight juvenile pigtail macaques  
28 infected intravenously with SHIV-1157ipd3N4, treated with combination antiretroviral therapy  
29 (cART), and infused with autologous HSPCs without CCR5 gene editing. We developed a  
30 mathematical model that simultaneously described reconstitution of CD4<sup>+</sup> CCR5<sup>+</sup>, CD4<sup>+</sup> CCR5<sup>-</sup>,  
31 and CD8<sup>+</sup> T cell counts, as well as SHIV plasma viral loads in control and transplanted  
32 macaques. By modifying the model to hypothetically describe transplant with some fraction of  
33 protected CCR5-edited cells, we found that transplantation had differential effects on the  
34 macaques' immunologic control of SHIV: those with a loss of immunologic control had a more  
35 profound depletion of CCR5<sup>+</sup>CD4<sup>+</sup> T cells and would require higher fractions of gene-edited  
36 cells (~97%) than those that maintained immunologic control (~60%). Our results provide a  
37 framework to predict the likelihood of post-rebound control *in vivo*, based on the percentage of  
38 CCR5-edited cells in peripheral blood and the loss of HIV-specific immunity following  
39 autologous HSPC.

40

41 **(Main text: 3789/4000 words, including headings)**

## 42 INTRODUCTION

43 The major obstacle to HIV-1 eradication is the latent reservoir of long-lived infected  
44 cells<sup>1-3</sup>. Cure strategies aim to eliminate all infected cells or prevent sustained viral reactivation  
45 from latency. The only known case of HIV cure<sup>4,5</sup> and an additional, recently-reported case of  
46 prolonged remission<sup>6</sup>, resulted from allogeneic hematopoietic stem cell transplant with  
47 homozygous CCR5 $\Delta$ 32 donor cells<sup>4-6</sup>. The success of this procedure is likely multifactorial—in  
48 part attributable to HIV resistance of the transplant product, the conditioning regimen that  
49 facilitates engraftment, some graft-versus-host effect, and immunosuppressive therapies for  
50 graft-versus-host disease<sup>7-11</sup>.

51 A current research focus is to recapitulate this method of cure with minimal toxicity. One  
52 method is to perform autologous transplantation following *ex vivo* editing of the CCR5 gene  
53 with a zinc finger nuclease, eliminating the need for allogeneic CCR5-negative donors<sup>12,13</sup>.  
54 While this procedure is safe and feasible in pigtail macaques infected with simian-human  
55 immunodeficiency virus (SHIV)<sup>13-16</sup>, only a fraction of HSPCs can be genetically modified *ex*  
56 *vivo* to be HIV-resistant.

57 Due to this challenge, we developed a mathematical model that can be used to predict the  
58 minimum threshold of persisting, gene-modified cells necessary for functional cure. First, we  
59 modeled the kinetics of CD4<sup>+</sup>CCR5<sup>+</sup>, CD4<sup>+</sup> CCR5<sup>-</sup>, and CD8<sup>+</sup> T cell reconstitution after  
60 autologous transplantation. We then modeled SHIV rebound kinetics following analytical  
61 treatment interruption (ATI) and identified the degree of loss of anti-HIV cytolytic immunity  
62 following transplantation. Finally, we projected the proportion of gene-modified cells and the  
63 levels of SHIV-specific immunity required to eliminate viral replication following ATI.

## 64 **METHODS**

### 65 **Experimental Data**

66 Eight juvenile pigtail macaques were intravenously challenged with 9500 TCID50 SHIV-  
67 1157ipd3N4 (SHIV-C)<sup>14,17</sup>. After 6 months, the macaques received combination antiretroviral  
68 therapy (cART: tenofovir [PMPA], emtricitabine [FTC], and raltegravir [RAL]). After ~25  
69 weeks on cART, four animals received total body irradiation (TBI) followed by transplantation  
70 of autologous HSPCs. After an additional 25 weeks following transplant, when viral load was  
71 fully suppressed, animals underwent analytical treatment interruption (ATI)<sup>14</sup>. A control group of  
72 four animals did not receive TBI or HSPCs transplantation and underwent ATI after ~50 weeks  
73 of treatment (**Fig. 1A**). Plasma viral loads and absolute quantified CD4<sup>+</sup>CCR5<sup>-</sup>, CD4<sup>+</sup>CCR5<sup>+</sup> and  
74 CD8<sup>+</sup> total and subsets (naïve, central memory [T<sub>CM</sub>], and effector memory [T<sub>EM</sub>]) T cell counts  
75 from peripheral blood were measured as described previously<sup>14,17</sup>. We analyzed peripheral T cell  
76 counts and plasma viral load from transplant until 43 weeks (~25 weeks pre-ATI and ~18 weeks  
77 post-ATI).

78

### 79 **Mathematical modeling**

80 We employed several series of ordinary differential equation models of cellular and viral  
81 dynamics after transplantation. First, we modeled T cell dynamics and reconstitution following  
82 transplant and before ATI, assuming that low viral levels do not affect cell dynamics (**Fig. 1B**).  
83 After curation of that model, we introduced viral dynamics and fit those to the T cell and viral  
84 rebound dynamics from the animals (**Fig. 1C**). Lastly, we used our complete model in a  
85 transplant scenario with gene editing of CCR5 to predict the minimal threshold of editing for  
86 functional HIV cure.

87  
88 *T cell reconstitution after transplantation:* We modeled the kinetics of CD4<sup>+</sup> and CD8<sup>+</sup> T cell  
89 subsets in blood, transplanted cells that home to the BM, and progenitor cells in the BM/thymus  
90 as shown in **Fig. 1B**. We included CD8<sup>+</sup> T cells in the model because CD8<sup>+</sup> and CD4<sup>+</sup> T cells  
91 may arise from new naïve cells from the thymus and compete for resources that impact clonal  
92 expansion and cell survival<sup>18-20</sup>. At the moment of HSPC infusion, transplanted animals are  
93 lymphopenic due to TBI. The control group did not have a transplanted-cell compartment, and  
94 all other compartments remained in steady state. We assumed that CD4<sup>+</sup> and CD8<sup>+</sup> T cell  
95 expansion may have two possible drivers: (1) lymphopenia-induced proliferation of mature cells  
96 that persist through myeloablative TBI<sup>18,21-25</sup>, and (2) differentiation from naïve cells from  
97 progenitors in the thymus (from transplanted CD34<sup>+</sup> HSPCs<sup>26,27</sup> or CD34<sup>+</sup> HSPCs that survive  
98 TBI) and further differentiation to an activated effector state<sup>24,25,28-32</sup>. We assumed that in a  
99 lymphopenic environment, factors that drive T cell proliferation are more accessible (i.e., self-  
100 MHC molecules on antigen-presenting cells<sup>28,29,33,34</sup> and  $\gamma$ -chain cytokines such as IL-7 and IL-  
101 15<sup>21-23,35-37</sup>). However, as they grow, cells compete for access to these resources, limiting clonal  
102 expansion<sup>18</sup> such that logistic growth models are appropriate<sup>19</sup>. We assume that new peripheral  
103 CD4<sup>+</sup> and CD8<sup>+</sup> T naïve cells come from a progenitor compartment in the BM/Thymus<sup>38,39</sup>. For  
104 CD4<sup>+</sup> T cells the models assume that naïve cells do not express CCR5<sup>40-42</sup>, and subsequently up-  
105 and/or down-regulate expression of the CCR5 receptor<sup>30</sup>. For CD8<sup>+</sup> T cells we included a single  
106 CD8<sup>+</sup> memory precursor compartment of T<sub>N</sub> and T<sub>CM</sub> cells that differentiate linearly into T<sub>EM</sub>  
107 during lymphopenia<sup>43-45</sup>. The details of the model are presented in the **Supp. Material** and in  
108 **Fig. 1B**, with the symbols described in **Table 1**. A parsimonious model based on the one

109 described above was selected from a series of models with varying statistical complexity as  
110 presented in the **Supp. Materials**.

111  
112 *T cell and viral dynamics:* We adapted the previous model combining several adaptations of the  
113 canonical model of viral dynamics<sup>43-53</sup> as shown in **Fig. 1C**. The model assumes that SHIV only  
114 infects CD4<sup>+</sup>CCR5<sup>+</sup> T cells<sup>17</sup>, and that only a small fraction (~ 5%) of those infected cells are  
115 able to produce infectious virus<sup>51,54,55</sup>. We modeled cART by reducing infection rate to zero, and  
116 modeled ATI by assuming infection is greater than zero after some time  $\Delta_t$  after interruption.  
117 This model assumes also that productively infected cells arise also from activation of a steady set  
118 of latently infected cells. The presence of both unproductively and productively infected cells  
119 leads to the expansion of CD8<sup>+</sup> T<sub>naïve</sub> and T<sub>CM</sub> cells, from which the majority of dividing cells  
120 differentiate into SHIV-specific effector cells<sup>30,46,47,52,53</sup>. The details of the model are presented in  
121 the **Supp. Material** and in **Fig. 1C**, with the symbols described in **Table 1**. A parsimonious  
122 model based on the one described above was selected from a series of models with varying  
123 statistical complexity as presented in the **Supp. Materials**.

124  
125 *Viral and T cell dynamics in the setting of  $\Delta$ CCR5 HSPC transplantation:* We next adapted our  
126 model to simulate scenarios in which autologous transplantation includes cells that are CCR5-  
127 edited. We added variables representing CCR5-edited HSPCs, T cell progenitors in BM/thymus,  
128 and CD4<sup>+</sup>CCR5<sup>-</sup> T cells in blood. These compartments have the same structure as CCR5-non-  
129 edited cells but with two differences. First, the value of HSPCs at transplantation is a fraction  $f_p$   
130 of the total number of infused cells, i.e. representing the proportion of infused HSPCs that were

131 CCR5-edited. Second, mature CD4<sup>+</sup>CCR5<sup>-</sup> cells with CCR5 edition do not upregulate CCR5 (see  
132 full model in **Supp. Materials**).

133

#### 134 **Fitting procedure and model selection**

135 We used a nonlinear, mixed-effects modeling approach<sup>56</sup> described in detail in **Supp.**  
136 **materials**. Briefly, parameters for individual animals were sampled from a probabilistic model  
137 that describes the population with a fixed effect or population median, and a random effect with  
138 a standard deviation that describes the parameter variability in the population. We first fit  
139 instances of the model in **Fig. 1B** to blood T cell counts during transplant and before ATI (**Table**  
140 **S1** includes all 19 competing models). Then, we fit several instances of the model **Fig. 1C** to  
141 blood T cell counts and plasma viral load during the period after transplant including ATI, using  
142 the best competing model for the model in **Fig. 1B** (**Table S2** includes all 15 competing models).  
143 For each step we fit each competing model to all data points from all animals simultaneously  
144 using a maximum likelihood approach. We estimated the standard deviation of the measurement  
145 error for the observations, and each parameter fixed effects and standard deviation of the random  
146 effects using the Stochastic Approximation of the Expectation Maximization (SAEM) algorithm  
147 embedded in the Monolix software ([www.lixoft.eu](http://www.lixoft.eu))<sup>56</sup>. For best fit of the different possible  
148 versions of the models we computed the log-likelihood ( $\log L$ ) and the Akaike Information  
149 Criteria ( $AIC = -2\log L + 2m$ , where  $m$  is the number of parameters estimated)<sup>57</sup> to obtain the most  
150 parsimonious model. We assumed a model has similar support from the data if the difference  
151 between its AIC and the best model (lowest) AIC is less than two<sup>57</sup> (see **Supp. materials** for  
152 details).

153

## 154 RESULTS

155 **CD4<sup>+</sup>CCR5<sup>+</sup> and CD8<sup>+</sup> T cells recover more rapidly than CD4<sup>+</sup>CCR5<sup>-</sup> T cells after HSPC**  
156 **transplantation.** We analyzed the kinetics of peripheral blood CD4<sup>+</sup>CCR5<sup>+</sup> and CD4<sup>+</sup>CCR5<sup>-</sup> T-  
157 cells, and total, T<sub>naïve</sub>, T<sub>CM</sub>, and T<sub>EM</sub> CD8<sup>+</sup> T-cells in macaques after HSPC transplantation (**Fig.**  
158 **1A**). In controls, levels of CD4<sup>+</sup> and CD8<sup>+</sup> T cells oscillated around a persistent set point (blue  
159 lines in **Fig. 2A-C** and **Fig. S1A-B**). In the control group, CD4<sup>+</sup> CCR5<sup>+</sup> T cell levels were ~100  
160 cells/μl and were uniformly lower than the CD4<sup>+</sup>CCR5<sup>-</sup> T cell counts (~1200 cells/μl) (p=0.01,  
161 Paired t-test of the averaged measures post-transplant. See **Fig. 2D**). Total CD8<sup>+</sup> T cell levels in  
162 the control group were ~1400 cells/μl with a greater contribution from T<sub>EM</sub> (73%) than T<sub>N</sub>+T<sub>CM</sub>  
163 (27%) (Based on median values. See **Fig. 2D**). In the transplant group immediately post-TBI, the  
164 levels of CD4<sup>+</sup>CCR5<sup>+</sup> T cells started at 1-10 cells/μl and reconstituted to levels similar to the  
165 control group over 5-10 weeks (**Fig. 2A**). After TBI, CD4<sup>+</sup>CCR5<sup>-</sup> T cells remained at higher  
166 levels (~100 cells/μl) than CD4<sup>+</sup>CCR5<sup>+</sup> T cells but expanded more slowly and did not reach the  
167 values of the control group after 25 weeks (**Fig. 2B**). The CD4<sup>+</sup>CCR5<sup>+</sup> T cell compartment  
168 expanded 8-fold more rapidly than the CD4<sup>+</sup>CCR5<sup>-</sup> compartment (p=0.01, Paired t-test. See **Fig.**  
169 **2E**). Following TBI in the transplanted group, CD8<sup>+</sup> T cells decreased to levels between 10 and  
170 100 cells/μl after TBI but recovered to levels below the control group in 5 weeks (**Fig. 2C**); these  
171 cells recovered as fast as the CD4<sup>+</sup>CCR5<sup>+</sup> population (**Fig. 2E**). CD8<sup>+</sup> T cell levels were highly  
172 correlated with the CD8<sup>+</sup> T<sub>EM</sub> subtype but not to the naïve or T<sub>CM</sub> subtypes (**Fig. 2F** and **Figures**  
173 **S1C-D**). Overall, these results show that during post-transplantation there is a faster  
174 reconstitution of CD4<sup>+</sup>CCR5<sup>+</sup> and CD8<sup>+</sup> T cells compared to CD4<sup>+</sup>CCR5<sup>-</sup> cells, and that CD8<sup>+</sup> T  
175 cells are composed mostly of T<sub>EM</sub>.

176



177 **Lymphopenia-induced proliferation favors CD4<sup>+</sup>CCR5<sup>+</sup> and CD8<sup>+</sup> T cell reconstitution**  
178 **after HPSC transplantation.** To understand what are the main drivers of T cell reconstitution  
179 we developed a mathematical model that included the plausible mechanisms underlying differing  
180 T cell subsets reconstitution following autologous transplantation (**Fig. 1B**). We built 19 versions  
181 of that model by assuming that one or multiple mechanisms are absent, or by assuming certain  
182 mechanisms have equal kinetics (**Table S1**). Using model selection theory based on AIC, we  
183 identified the model in **Fig. 3A** which most parsimoniously reproduces the data (**Table S1**). The  
184 main features of this model are: (1) CD4<sup>+</sup>CCR5<sup>+</sup> T cell reconstitution after transplant is driven  
185 by proliferation and upregulation of CCR5; (2) CD4<sup>+</sup>CCR5<sup>-</sup> T cell expansion is driven only by  
186 new naïve cells from the thymus; and (3), thymic export rates are equal between CD4<sup>+</sup> and CD8<sup>+</sup>  
187 naïve T cells.

188 The best fits of this model are presented in **Figures S2-S3** and **Fig. 3B-E** with the  
189 respective parameter estimates in **Tables S3-S4**. The best fitted model predicts that CD4<sup>+</sup>CCR5<sup>-</sup>  
190 T cells have a delayed reconstitution that occurs only when cells from the thymus (estimated  
191 with rate ~0.01/day) outnumber their loss during death, trafficking to tissues or upregulation of  
192 CCR5. Furthermore, the estimated CD4<sup>+</sup>CCR5<sup>+</sup> T cell proliferation rate (~0.1/day) far exceed  
193 the estimated CCR5 upregulation (~0.004/day) and thymic export rates. Therefore, total cell  
194 proliferation in this cell compartment is predicted by the model to be up to 40-fold higher than  
195 the concentration of cells that up-regulate CCR5 (**Fig. 3F** and **Fig. S4**).

196 Our model also predicts that CD8<sup>+</sup> T cells follow a similar pattern to CD4<sup>+</sup>CCR5<sup>+</sup> T cells  
197 (**Fig. 3D-E**), with CD8<sup>+</sup> T<sub>EM</sub> proliferation rate up to 10-fold higher than the CD8<sup>+</sup> T cell  
198 differentiation rate (**Fig. S4**). Overall, these results suggest that following autologous HSPC  
199 transplant: (1) slow thymic export is the main driver of CD4<sup>+</sup>CCR5<sup>-</sup> T cell growth, and (2) rapid

200 lymphopenia-induced proliferation of remaining cells (rather than transplanted cells) after TBI is  
201 the main driver for CD4<sup>+</sup>CCR5<sup>+</sup> and CD8<sup>+</sup> T cell expansion.

202

203 **Reduction of blood CD4<sup>+</sup>CCR5<sup>+</sup> T cell counts correlates with plasma viral rebound after**

204 **ATI in animals that underwent HSPC transplantation.** We next aimed to compare plasma

205 viral load rebound kinetics to CD4<sup>+</sup>CCR5<sup>+</sup> and CCR5<sup>-</sup> T cell subset dynamics after ATI, in the

206 context of previous plasma viral load analyses that we have performed from these animals<sup>14,51</sup>.

207 **Fig. 4A-C** presents the plasma viral loads and the blood CD4<sup>+</sup>CCR5<sup>+</sup> and CD4<sup>+</sup>CCR5<sup>-</sup> T cell

208 counts before and after ATI. The median peak viral load after treatment interruption was 10-fold

209 higher for the transplant group (p=0.06, Mann-Whitney test. See **Fig. 4D**). Similarly, the median

210 of the final viral load measurements at necropsy was 2-log<sub>10</sub> higher in the transplant group

211 (p=0.06, Mann-Whitney test. See **Fig.4E**). CD4<sup>+</sup>CCR5<sup>+</sup> T-cell counts decreased after ATI in the

212 transplant group: nadir was significantly lower (~8-fold) than in the control animals (p=0.01,

213 Mann-Whitney test. **Fig. 4F**). The maximum reduction of CD4<sup>+</sup>CCR5<sup>+</sup> T cells occurred in the

214 same two animals with the highest viral set points. There was no difference between control and

215 transplant groups in the CD4<sup>+</sup>CCR5<sup>-</sup> T cell compartment: both groups had an average of ~200

216 cells/μL (**Fig.4G**). None of the individual plasma viral load observations in the control group

217 post-ATI did not correlate with the corresponding CD4<sup>+</sup>CCR5<sup>+</sup> T-cell counts post-ATI.

218 However, in three animals in the transplant group, viral load observations post-ATI correlated

219 negatively with their corresponding CD4<sup>+</sup>CCR5<sup>+</sup> T cell counts (**Fig. 4H**). On the other hand,

220 plasma viral loads were negatively correlated with the CD4<sup>+</sup>CCR5<sup>-</sup> T cell count in two animals

221 in both the control and transplant groups (**Fig. S5**). These results suggest that autologous HSPC

222 transplantation (without gene editing) affects SHIV-infected macaques so that the presence of the  
223 virus leads to more depletion of CD4<sup>+</sup>CCR5<sup>+</sup> T cells.

224

225 **Higher viral set points and CD4<sup>+</sup>CCR5<sup>+</sup> T-cell depletion following transplantation and ATI**

226 **are due to a reduction in SHIV-specific immunity.** To understand why transplantation may

227 have an effect in virus and CD4<sup>+</sup>CCR5<sup>+</sup> T cell kinetics during ATI, we modified our

228 mathematical model to include SHIV infection as described in **Fig. 1C (Methods)**. Using model

229 selection theory based on AIC, we found that the most parsimonious model to explain the data

230 was the one shown in **Fig. 5A (Table S2)**. In the best fit model SHIV-specific CD8<sup>+</sup> effector

231 cells reduce virus production in a non-cytolytic manner<sup>58-60</sup> (e.g. possibly by secretion of HIV-

232 antiviral factors<sup>61-64</sup>—not included in the model). Finally, the model assumes that infection leads

233 to enhanced activation of CD4<sup>+</sup>CCR5<sup>-</sup> T cells leading to replenishment of CD4<sup>+</sup>CCR5<sup>+</sup> T cells,

234 explaining the concentration reduction of the CD4<sup>+</sup>CCR5<sup>-</sup> compartment after ATI<sup>65-68</sup>.

235 The model simultaneously recapitulates plasma viral rebound, and the kinetics of CD4<sup>+</sup>

236 CCR5<sup>+</sup> and CCR5<sup>-</sup> T cells in each animal as shown in **Fig. 5B** and **Fig. S6-S7** with

237 corresponding estimated parameters in **Table 1** and **Table S5-S6**. From the estimated

238 parameters, only SHIV-based CD8<sup>+</sup> proliferation rate,  $\omega_8$ , correlated with post-ATI viral load set

239 point and CD4<sup>+</sup>CCR5<sup>+</sup> T-cell nadir (**Fig. 5C-D**). We also found that the estimated SHIV-based

240 CD8<sup>+</sup> proliferation rate ( $\omega_8$ ) was significantly lower in the transplant group, and the estimated

241 time to viral rebound ( $\Delta_t$ ) was significantly higher in the transplant group (**Fig. 5E-F**). The

242 projected fraction of SHIV-specific CD8<sup>+</sup> T cells in the transplant group approached zero (**Fig.**

243 **S8**). Overall, these results suggest that HSPC transplantation may lead to varying degrees of loss

244 of the immune response to SHIV infected cells, in turn leading to higher viral loads and loss of  
245 CD4<sup>+</sup>CCR5<sup>+</sup> T cells.  
246  
247 **Greater loss of immunologic control during TBI/transplant requires higher numbers of**  
248 **CCR5-edited HSPCs to control viral rebound after ATI.** To calculate the minimum threshold  
249 of CCR5-edited cells necessary to induce cART-independent virus suppression, we next added a  
250 population of transplanted, gene-edited CCR5 HSPCs to the model in equation 2. We assumed  
251 that in the infused product there is a fraction  $f_p$  of HSPCs that have a biallelically modified CCR5  
252 gene. Hence, CD4<sup>+</sup> T-cells derived from these HSPCs should not express CCR5. In the model  
253 we added state variables for protected progenitors and CD4<sup>+</sup>CCR5<sup>-</sup> T cells that cannot become  
254 CD4<sup>+</sup>CCR5<sup>+</sup> T cells (**Fig. 6A**, full model in **Supp. Materials**). **Fig. 6B** depicts projections of the  
255 model using the best estimates from the fits of the model to transplanted animal Z09144, using  
256 six values of  $f_p$ . For this animal, an initial fraction of protected cells smaller or equal than 40%  
257 will not lead to post-rebound viral control after ATI, even after a year. However, it is possible to  
258 have a spontaneous post-rebound viral control at ~40 weeks and 10 weeks after ATI when  $f_p$  is  
259 60% or greater than 80%. We then simulated the model using parameter values obtained from  
260 the best fit in the previous section for each animal in the transplant group using 100 values of  $f_p$   
261 from zero to one (0-100% CCR5-edited HSPCs). The heatmaps in **Fig. 6C-F** show plasma viral  
262 load projections after 2 years after the start of ATI for different values of  $f_p$ . The model predicts  
263 that the minimum  $f_p$  to maintain post-rebound control for 2 years after ATI is higher for animals  
264 with lower estimated SHIV-specific immune response rates. Using parameters estimates from the  
265 two animals in the transplant group with lower viral setpoints, the minimum  $f_p$  for viral control  
266 was 35% and 19% (**Fig. 6E-F**). In contrast, for the other two animals the minimum  $f_p$  for viral

267 control was 56% and 97% (**Fig. 6C-D**). These model projections suggest that a larger loss of  
268 immunologic control during TBI/HSPC transplant requires a higher fraction of CCR5 gene-  
269 edited cells to control viral rebound after ATI.

270 The model also predicts that for some values of  $f_p$  it is possible to have two viral set  
271 points: an initial high viral set point in the first weeks after ATI and then a delayed ART-free  
272 viral remission (e.g. when  $f_p=60\%$  in **Fig. 6B** and between 60% and 70% in **Fig. 6C**). Therefore,  
273 in some cases the viral load set point during the initial weeks after ATI might not be a sufficient  
274 surrogate to predict viral control further in the future. However, we found that for the simulations  
275 predicting a delayed viral remission, the maximum decrease of CD4<sup>+</sup>CCR5<sup>+</sup> T cells during the  
276 first 10 weeks after ATI has a linear relationship with the minimum initial fraction of protected  
277 cells required to obtain post-rebound control after 2 years (**Fig. 6G**). We repeated these  
278 projections by adding the estimated measurement error to the simulations and obtained similar  
279 results (**Fig. 6H**). Therefore, the maximum initial change in CD4<sup>+</sup>CCR5<sup>+</sup> T cells 10 weeks after  
280 ATI might predict late viral control.

## 281 **Discussion**

282 Here we introduce a data-validated mathematical that to our knowledge is the first to  
283 simultaneously recapitulate SHIV viral loads, as well as CD4<sup>+</sup> and CD8<sup>+</sup> T cell count subsets.  
284 The model predicts that post-rebound viral control might be possible during autologous gene-  
285 edited HSPC transplantation if therapy achieves (1) a sufficient fraction of gene-protected,  
286 autologous HSPCs, and (2) maintenance or enhancement of SHIV-specific immune responses  
287 following transplantation. Specifically, the model predicts that increasing amounts of  
288 conditioning regimen-dependent depletion of the SHIV-specific immune response leads to a  
289 higher threshold of CCR5-gene-edited cells in the transplanted HSPC product required to obtain

290 stable, ART-free viral control. These results are consistent with the cure achieved by the Berlin  
291 patient who received transplant with 100% HIV-resistant cells after intense conditioning<sup>4,5</sup>. In  
292 the autologous setting where 100% CCR5 editing may not be feasible, adjunctive measures that  
293 augment virus-specific immunity, such as therapeutic vaccination, infusion of HIV-specific CAR  
294 T cells or use of neutralizing antibodies, may synergize with HSPC transplantation to achieve  
295 post-treatment control<sup>11,69</sup>.

296 We systematically selected from a series of mathematical models to arrive at a set of  
297 equations that most parsimoniously explains the available data. We recapitulated (1) peripheral  
298 CD4<sup>+</sup> and CD8<sup>+</sup> T-cell subset reconstitution dynamics following transplant, and (2) T-cell  
299 dynamics and SHIV viral rebound following ATI. Before ATI, all animals suppressed plasma  
300 viral load below the limit of detection, allowing analysis of T cell reconstitution dynamics  
301 independent of virus-mediated pressure. At each step, we applied model selection theory to  
302 select the simplest set of mechanisms capable of explaining the observed data<sup>57</sup>.

303 The best model predicts that the lack of complete elimination of lymphocytes by TBI  
304 prevents CD4<sup>+</sup>CCR5<sup>-</sup> cells from predominating post-transplant: the rapid expansion of  
305 CD4<sup>+</sup>CCR5<sup>+</sup> and CD8<sup>+</sup> T cells during the first few weeks after HSPC transplantation is most  
306 likely due to lymphopenia-induced proliferation of remaining cells after TBI via a thymus-  
307 independent pathway; the slower expansion of CD4<sup>+</sup>CCR5<sup>-</sup> T cells is more likely due to thymic  
308 export of both transplanted and remaining cells. An important future research question will be to  
309 identify anatomic sites and mechanisms allowing activated CD4<sup>+</sup>CCR5<sup>+</sup> to survive conditioning.

310 A challenge is that more intense conditioning may decrease remaining CD4<sup>+</sup>CCR5<sup>+</sup> cells  
311 but will also lower SHIV specific immunity. We previously demonstrated the link between  
312 disruption of the immune response during transplant and increased magnitude of viral rebound

313 during treatment interruption<sup>14,51</sup>. Here we predict that the magnitude of the SHIV-specific  
314 immune response is correlated not only with viral load set point, but also with the reduction of  
315 CD4<sup>+</sup>CCR5<sup>+</sup> T cells after ATI. CD4<sup>+</sup>CCR5<sup>+</sup> T cell depletion might be predictive of the loss of  
316 depletion of virus-specific immunity following conditioning.

317 A final important observation from the model is that viral control may be delayed beyond  
318 the first ten weeks after ATI, rather occurring after many months of treatment interruption. Thus,  
319 viral load levels during the initial weeks after ATI may not completely define success (stable  
320 ART-free remission), whereas CD4<sup>+</sup>CCR5<sup>+</sup> T-cell nadir should more strongly correlate with the  
321 degree of depletion of virus-specific immunity. In this sense, minimal CD4<sup>+</sup>CCR5<sup>+</sup> T-cell nadir  
322 may predict post-rebound viral control, if the starting fraction of protected cells is known.

323 Our results are limited by a small sample size of eight animals. For that reason, several  
324 model parameters were assumed to be the same among the population (i.e., without random  
325 effects). However, the number of observations for each animal was large enough to discriminate  
326 among different plausible model candidates. Therefore, we performed projections using only the  
327 individual estimated parameters. Reassuringly, our results align with prior mechanistic studies of  
328 cellular reconstitution after stem cell transplantation<sup>18,26,38,70,71</sup>. Our analysis also suggests that  
329 the majority of reconstituting CD4<sup>+</sup>CCR5<sup>-</sup> T cells do not proliferate and have a slow expansion  
330 that concurs with estimates of thymic export from previous studies<sup>26,70,71</sup>.

331 While our work highlights the complexity of the interplay between reconstituting HIV  
332 susceptible CD4<sup>+</sup> T cells, HIV-resistant CD4<sup>+</sup> T cells, infected cells, virus-specific immune cells,  
333 and replicating virus following autologous, CCR5-edited HPSC transplantation, our results  
334 illustrate the capabilities of modeling to glean insight from such a complex system. A

335 comprehensive understanding of these and similar systems will be required to optimize strategies  
336 for pre-clinical HIV cure studies, both in the macaque model, as well as in HIV<sup>+</sup> individuals.

### 337 **Acknowledgements**

338 This study was supported by grants from the National Institutes of Health, National Institute of  
339 Allergy and Infectious Diseases (UM1 AI126623). ERD is supported by the National Center for  
340 Advancing Translational Sciences of the National Institutes of Health under Award Number KL2  
341 TR002317. DBR is supported by a Washington Research Foundation postdoctoral fellowship,  
342 and a CFAR NIA P30 AI027757. The funders had no role in study design, data collection and  
343 analysis, decision to publish, or preparation of the manuscript. The content is solely the  
344 responsibility of the authors and does not necessarily represent the official views of the National  
345 Institutes of Health or the Washington Research Foundation.

### 346 **Disclosure of conflicts of interest**

347 The authors declare no competing financial interests.

### 348 **Animal welfare.**

349 The data used in this work were collected in strict accordance with the recommendations in the  
350 *Guide for the Care and Use of Laboratory Animals* of the National Institutes of Health. The  
351 study protocol was approved by the Institutional Animal Care and Use Committees (3235-03) of  
352 the Fred Hutchinson Cancer Research Center and the University of Washington.



353 **Tables**

354 **Table 1. Parameters of the model.** Values are from steady state equations, using population  
 355 estimates from best model fits or assumed from the references as described. When assumed from  
 356 steady state equations, population estimates were used. See **Supp. Materials** for more details.

357

| Parameter | Units          | Description                                                                                | Value          |                | Source                                                                                      |
|-----------|----------------|--------------------------------------------------------------------------------------------|----------------|----------------|---------------------------------------------------------------------------------------------|
|           |                |                                                                                            | Control        | Transplant     |                                                                                             |
| $T(t_0)$  | cells          | Number of cells in the transplant product.                                                 | 0              | $4 \cdot 10^7$ | Fixed, assumed from reference <sup>14</sup> .                                               |
| $P(t_0)$  | cells          | Number of cells in the BM/Thymus at the moment of transplant.                              | $4 \cdot 10^8$ | 0              | Control: Computed from the median of steady state equations.<br>Transplant: Fixed, assumed. |
| $N(t_0)$  | cells/ $\mu$ L | Blood CD4 <sup>+</sup> CCR5 <sup>-</sup> T cell concentration at the moment of transplant. | 1249           | 47             | Control: Computed from the median of steady state equations.<br>Transplant: Fitted.         |
| $S(t_0)$  | cells/ $\mu$ L | Blood CD4 <sup>+</sup> CCR5 <sup>+</sup> T cell                                            | 115            | 2              | Control: Computed from                                                                      |

|            |                |                                                                                                         |                   |                   |                                                                                        |
|------------|----------------|---------------------------------------------------------------------------------------------------------|-------------------|-------------------|----------------------------------------------------------------------------------------|
|            |                | concentration at the moment of transplant.                                                              |                   |                   | the median of steady state equations.<br>Transplant: Fitted.                           |
| $M(t_0)$   | cells/ $\mu$ L | Blood CD8 <sup>+</sup> T <sub>N</sub> + T <sub>CM</sub> cell concentration at the moment of transplant. | 305               | 8                 | Control:<br>Computed from the median of steady state equations.<br>Transplant: Fitted. |
| $E(t_0)$   | cells/ $\mu$ L | Blood CD8 <sup>+</sup> T <sub>EM</sub> cell concentration at the moment of transplant.                  | 935               | 17                | Control:<br>Computed from the median of steady state equations.<br>Transplant: Fitted. |
| $E_h(t_0)$ | cells/ $\mu$ L | Blood SHIV-specific CD8 <sup>+</sup> T effector cell concentration at the moment of transplant.         | 0                 | 0                 | Control:<br>Computed from steady state equations.<br>Transplant:<br>Assumed.           |
| $I_p(t_0)$ | cells/ $\mu$ L | Productively infected blood CD4 <sup>+</sup> CCR5 <sup>+</sup> T cell concentration at the              | $2 \cdot 10^{-6}$ | $2 \cdot 10^{-6}$ | Computed from steady state equations.                                                  |

|                                     |                |                                                                                                                    |       |     |                                                   |
|-------------------------------------|----------------|--------------------------------------------------------------------------------------------------------------------|-------|-----|---------------------------------------------------|
|                                     |                | moment of transplant.                                                                                              |       |     |                                                   |
| $I_u(t_0)$                          | cells/ $\mu$ L | Unproductively infected blood CD4 <sup>+</sup> CCR5 <sup>+</sup> T cell concentration at the moment of transplant. | 0     | 0   | Computed from steady state equations.             |
| $V(t_0)$                            | RNA copies/mL  | Plasma viral load at the moment of transplant.                                                                     | 0.5   | 0.5 | Computed from steady state equations.             |
| $k_e$                               | 1/day          | Homing rate of transplanted cells into the bone marrow.                                                            | 1     |     | Fixed, assumed from references <sup>72,73</sup> . |
| $\hat{r}_p = r_p - \lambda_p - d_p$ | 1/day          | Renewal rate of stem and progenitor cells in the bone marrow/thymus.                                               | 0.04  |     | Fitted.                                           |
| $\hat{r}_s = r_s - d_s$             | 1/day          | Proliferation rate of blood CD4 <sup>+</sup> CCR5 <sup>+</sup> T cells.                                            | 0.14  |     | Fitted.                                           |
| $\hat{r}_m = r_m - \lambda_m - d_m$ | 1/day          | Proliferation rate of blood CD8 <sup>+</sup> T <sub>N</sub> <sup>+</sup> T <sub>CM</sub> cells.                    | 0.003 |     | Fitted.                                           |

|                                     |                |                                                                                                                            |       |         |
|-------------------------------------|----------------|----------------------------------------------------------------------------------------------------------------------------|-------|---------|
| $\hat{r}_e = r_e - d_e$             | 1/day          | Proliferation rate of CD8 <sup>+</sup> T <sub>EM</sub> cells.                                                              | 0.09  | Fitted. |
| $\hat{d}_n = \lambda_n + d_n$       | 1/day          | Removal rate of blood CD4 <sup>+</sup> CCR5 <sup>-</sup> T cells.                                                          | 0.01  | Fitted. |
| $\lambda_p = \lambda_e = \lambda_f$ | 1/day          | Thymic output rate of T cells.                                                                                             | 0.01  | Fitted. |
| $\lambda_n$                         | 1/day          | CCR5 upregulation rate in CD4 <sup>+</sup> T cells.                                                                        | 0.004 | Fitted. |
| $\lambda_m$                         | 1/day          | Differentiation rate of CD8 <sup>+</sup> T <sub>N</sub> + T <sub>CM</sub> cells to CD8 <sup>+</sup> T <sub>EM</sub> cells. | 0.09  | Fitted. |
| $K_p = K \frac{\hat{r}_p}{r_p}$     | cells/ $\mu$ L | Effective carrying capacity of progenitor cells.                                                                           | 1664  | Fitted. |
| $K_s = K \frac{\hat{r}_s}{r_s}$     | cells/ $\mu$ L | Effective carrying capacity of CD4 <sup>+</sup> CCR5 <sup>+</sup> T cells.                                                 | 1328  | Fitted. |
| $K_m = K \frac{\hat{r}_m}{r_m}$     | cells/ $\mu$ L | Effective carrying capacity of CD8 <sup>+</sup> T <sub>N</sub> + T <sub>CM</sub> cells.                                    | 49    | Fitted. |

|                                 |                        |                                                                        |                   |                                                                          |
|---------------------------------|------------------------|------------------------------------------------------------------------|-------------------|--------------------------------------------------------------------------|
| $K_e = K \frac{\hat{r}_e}{r_e}$ | cells/ $\mu$ L         | Effective carrying capacity of CD8 <sup>+</sup> T <sub>EM</sub> cells. | 1257              | Fitted.                                                                  |
| $\beta$                         | $\mu$ L/<br>copies/day | Infectivity rate.                                                      | 0.0003            | Fitted.                                                                  |
| $\Delta_t$                      | days                   | Time to rebound after ATI.                                             | 7.5               | Fitted.                                                                  |
| $\delta_I$                      | 1/day                  | Death rate of infected CD4 <sup>+</sup> CCR5 <sup>+</sup> T cells.     | 1                 | Fixed, assumed using estimates from references <sup>74,75</sup> .        |
| $\tau$                          | -                      | Fraction of infected cell that produce infectious virus.               | 0.05              | Fixed, assumed from reference <sup>54</sup> .                            |
| $\xi \bar{L}$                   | cells/ $\mu$ L/day     | Number of latent cells that activate per day.                          | $2 \cdot 10^{-7}$ | Fixed, assumed to have a viral load of $\sim 0.5$ copies/mL during cART. |
| $\pi$                           | 1/day                  | Viral production rate.                                                 | $5 \cdot 10^4$    | Fixed, assumed using estimates from reference <sup>76</sup> .            |
| $\gamma$                        | 1/day                  | Virus clearance rate.                                                  | 23                | Fixed, assumed using estimates from reference <sup>77</sup> .            |
| $\omega_4$                      | $\mu$ L/cells/day      | SHIV-dependent replenishment of                                        | 0.19              | Fitted.                                                                  |

|                    |                                       |                                                                                          |       |                                               |
|--------------------|---------------------------------------|------------------------------------------------------------------------------------------|-------|-----------------------------------------------|
|                    |                                       | CD4 <sup>+</sup> CCR5 <sup>+</sup> T cells.                                              |       |                                               |
| $\omega_8$         | $\mu\text{L}/\text{cells}/\text{day}$ | SHIV-dependent proliferation rate of CD8 <sup>+</sup> T cells.                           | 0.002 | Fitted.                                       |
| $I_{50}$           | $\text{cells}/\mu\text{L}$            | 50% maximum value of adaptive infected cells, allows bounded growth.                     | 0.20  | Fitted.                                       |
| $f$                | -                                     | Fraction of SHIV-CD8 <sup>+</sup> -responding cells that become SHIV-specific effectors. | 0.9   | Fixed, assumed from reference <sup>46</sup> . |
| $d_h$              | 1/day                                 | Death rate of SHIV-specific effector CD8 <sup>+</sup> T cells.                           | 0.05  | Fitted.                                       |
| $\frac{1}{\theta}$ | $\mu\text{L}/\text{cells}$            | 50% maximum value of SHIV-specific immune cells to block virus production.               | 1     | Fixed.                                        |

## 359 **References**

- 360 1. Chun T-W, Carruth L, Finzi D, et al. Quantification of latent tissue reservoirs and total  
361 body viral load in HIV-1 infection. *Nature*. 1997;387(6629):183.
- 362 2. Chun T-W, Finzi D, Margolick J, Chadwick K, Schwartz D, Siliciano RF. In vivo fate of  
363 HIV-1-infected T cells: Quantitative analysis of the transition to stable latency. *Nature Medicine*.  
364 1995;1(12):1284-1290.
- 365 3. Finzi D, Hermankova M, Pierson T, et al. Identification of a Reservoir for HIV-1 in  
366 Patients on Highly Active Antiretroviral Therapy. *Science*. 1997;278(5341):1295-1300.
- 367 4. Allers K, Hütter G, Hofmann J, et al. Evidence for the cure of HIV infection by  
368 CCR5 $\Delta$ 32/ $\Delta$ 32 stem cell transplantation. *Blood*. 2011;117(10):2791-2799.
- 369 5. Hütter G, Nowak D, Mossner M, et al. Long-Term Control of HIV by CCR5  
370 Delta32/Delta32 Stem-Cell Transplantation. *New England Journal of Medicine*.  
371 2009;360(7):692-698.
- 372 6. Gupta RK, Abdul-jawad S, McCoy LE, et al. HIV-1 remission following CCR5 $\Delta$ 32/ $\Delta$ 32  
373 haematopoietic stem-cell transplantation. *Nature*. 2019:1.
- 374 7. Henrich TJ, Hanhauser E, Harrison LJ, et al. CCR5- $\Delta$ 32 Heterozygosity, HIV-1  
375 Reservoir Size, and Lymphocyte Activation in Individuals Receiving Long-term Suppressive  
376 Antiretroviral Therapy. *The Journal of Infectious Diseases*. 2016;213(5):766-770.
- 377 8. Henrich TJ, Hanhauser E, Marty FM, et al. Antiretroviral-Free HIV-1 Remission and  
378 Viral Rebound After Allogeneic Stem Cell Transplantation: Report of 2 Cases. *Annals of*  
379 *Internal Medicine*. 2014;161(5):319.

- 380 9. Henrich TJ, Hu Z, Li JZ, et al. Long-Term Reduction in Peripheral Blood HIV Type 1  
381 Reservoirs Following Reduced-Intensity Conditioning Allogeneic Stem Cell Transplantation.  
382 *The Journal of Infectious Diseases*. 2013;207(11):1694-1702.
- 383 10. Salgado M, Kwon M, Gálvez C, et al. Mechanisms That Contribute to a Profound  
384 Reduction of the HIV-1 Reservoir After Allogeneic Stem Cell Transplant. *Annals of Internal*  
385 *Medicine*. 2018.
- 386 11. Haworth KG, Peterson CW, Kiem H-P. CCR5-edited gene therapies for HIV cure:  
387 Closing the door to viral entry. *Cytotherapy*. 2017;19(11):1325-1338.
- 388 12. Tebas P, Stein D, Tang WW, et al. Gene Editing of CCR5 in Autologous CD4 T Cells of  
389 Persons Infected with HIV. *New England Journal of Medicine*. 2014;370(10):901-910.
- 390 13. Peterson CW, Wang J, Norman KK, et al. Long-term multilineage engraftment of  
391 autologous genome-edited hematopoietic stem cells in nonhuman primates. *Blood*.  
392 2016;127(20):2416-2426.
- 393 14. Peterson CW, Benne C, Polacino P, et al. Loss of immune homeostasis dictates SHIV  
394 rebound after stem-cell transplantation. *JCI Insight*. 2017;2(4).
- 395 15. Peterson CW, Haworth KG, Polacino P, et al. Lack of viral control and development of  
396 combination antiretroviral therapy escape mutations in macaques after bone marrow  
397 transplantation. *Aids*. 2015;29(13):1597-1606.
- 398 16. Peterson CW, Wang J, Deleage C, et al. Differential impact of transplantation on  
399 peripheral and tissue-associated viral reservoirs: Implications for HIV gene therapy. *PLOS*  
400 *Pathogens*. 2018;14(4):e1006956.
- 401 17. Ho O, Larsen K, Polacino P, et al. Pathogenic infection of *Macaca nemestrina* with a  
402 CCR5-tropic subtype-C simian-human immunodeficiency virus. *Retrovirology*. 2009;6(1):65.



- 403 18. Jameson SC. Maintaining the norm: T-cell homeostasis. *Nature Reviews Immunology*.  
404 2002;2(8):547-556.
- 405 19. Mehr R, Perelson AS. Blind T-cell homeostasis and the CD4/CD8 ratio in the thymus and  
406 peripheral blood. *Journal of Acquired Immune Deficiency Syndromes and Human Retrovirology*:  
407 *Official Publication of the International Retrovirology Association*. 1997;14(5):387-398.
- 408 20. Margolick JB, Donnenberg AD. T-cell homeostasis in HIV-1 infection. *Seminars in*  
409 *Immunology*. 1997;9(6):381-388.
- 410 21. Schluns KS, Williams K, Ma A, Zheng XX, Lefrançois L. Cutting Edge: Requirement for  
411 IL-15 in the Generation of Primary and Memory Antigen-Specific CD8 T Cells. *The Journal of*  
412 *Immunology*. 2002;168(10):4827-4831.
- 413 22. Schluns KS, Kieper WC, Jameson SC, Lefrançois L. Interleukin-7 mediates the  
414 homeostasis of naïve and memory CD8 T cells *in vivo*. *Nature Immunology*. 2000;1(5):426-432.
- 415 23. Goldrath AW, Luckey CJ, Park R, Benoist C, Mathis D. The molecular program induced  
416 in T cells undergoing homeostatic proliferation. *Proceedings of the National Academy of*  
417 *Sciences*. 2004;101(48):16885-16890.
- 418 24. Voehringer D, Liang H-E, Locksley RM. Homeostasis and Effector Function of  
419 Lymphopenia-Induced “Memory-Like” T Cells in Constitutively T Cell-Depleted Mice. *The*  
420 *Journal of Immunology*. 2008;180(7):4742-4753.
- 421 25. Boyman O, Létourneau S, Krieg C, Sprent J. Homeostatic proliferation and survival of  
422 naïve and memory T cells. *European Journal of Immunology*. 2009;39(8):2088-2094.
- 423 26. Douek DC, Vescio RA, Betts MR, et al. Assessment of thymic output in adults after  
424 haematopoietic stemcell transplantation and prediction of T-cell reconstitution. *The Lancet*.  
425 2000;355(9218):1875-1881.

- 426 27. Douek DC, McFarland RD, Keiser PH, et al. Changes in thymic function with age and  
427 during the treatment of HIV infection. *Nature*. 1998;396(6712):690-695.
- 428 28. Bender J, Mitchell T, Kappler J, Marrack P. Cd4+ T Cell Division in Irradiated Mice  
429 Requires Peptides Distinct from Those Responsible for Thymic Selection. *Journal of*  
430 *Experimental Medicine*. 1999;190(3):367-374.
- 431 29. Kieper WC, Jameson SC. Homeostatic expansion and phenotypic conversion of naïve T  
432 cells in response to self peptide/MHC ligands. *Proceedings of the National Academy of Sciences*.  
433 1999;96(23):13306-13311.
- 434 30. Sallusto F, Geginat J, Lanzavecchia A. Central Memory and Effector Memory T Cell  
435 Subsets: Function, Generation, and Maintenance. *Annual Review of Immunology*.  
436 2004;22(1):745-763.
- 437 31. Saout CL, Mennechet S, Taylor N, Hernandez J. Memory-like CD8+ and CD4+ T cells  
438 cooperate to break peripheral tolerance under lymphopenic conditions. *Proceedings of the*  
439 *National Academy of Sciences*. 2008;105(49):19414-19419.
- 440 32. Sprent J, Surh CD. Normal T cell homeostasis: the conversion of naïve cells into  
441 memory-phenotype cells. *Nature Immunology*. 2011;12(6):478-484.
- 442 33. Takeda S, Rodewald H-R, Arakawa H, Bluethmann H, Shimizu T. MHC Class II  
443 Molecules Are Not Required for Survival of Newly Generated CD4+ T Cells, but Affect Their  
444 Long-Term Life Span. *Immunity*. 1996;5(3):217-228.
- 445 34. Tanchot C, Lemonnier FA, Pérarnau B, Freitas AA, Rocha B. Differential Requirements  
446 for Survival and Proliferation of CD8 Naïve or Memory T Cells. *Science*. 1997;276(5321):2057-  
447 2062.

- 448 35. Fry TJ, Mackall CL. Interleukin-7: master regulator of peripheral T-cell homeostasis?  
449 *Trends in Immunology*. 2001;22(10):564-571.
- 450 36. Tan JT, Dudl E, LeRoy E, et al. IL-7 is critical for homeostatic proliferation and survival  
451 of naïve T cells. *Proceedings of the National Academy of Sciences*. 2001;98(15):8732-8737.
- 452 37. Yamaki S, Ine S, Kawabe T, et al. OX40 and IL-7 play synergistic roles in the  
453 homeostatic proliferation of effector memory CD4<sup>+</sup> T cells. *European Journal of Immunology*.  
454 2014;44(10):3015-3025.
- 455 38. Guillaume T, Rubinstein DB, Symann M. Immune Reconstitution and Immunotherapy  
456 After Autologous Hematopoietic Stem Cell Transplantation. *Blood*. 1998;92(5):1471-1490.
- 457 39. Spits H. Development of  $\alpha\beta$  T cells in the human thymus. *Nature Reviews Immunology*.  
458 2002;2(10):760.
- 459 40. Berkowitz RD, Beckerman KP, Schall TJ, McCune JM. CXCR4 and CCR5 Expression  
460 Delineates Targets for HIV-1 Disruption of T Cell Differentiation. *The Journal of Immunology*.  
461 1998;161(7):3702-3710.
- 462 41. Bleul CC, Wu L, Hoxie JA, Springer TA, Mackay CR. The HIV coreceptors CXCR4 and  
463 CCR5 are differentially expressed and regulated on human T lymphocytes. *Proceedings of the*  
464 *National Academy of Sciences*. 1997;94(5):1925-1930.
- 465 42. Zaitseva MB, Lee S, Rabin RL, et al. CXCR4 and CCR5 on Human Thymocytes:  
466 Biological Function and Role in HIV-1 Infection. *The Journal of Immunology*.  
467 1998;161(6):3103-3113.
- 468 43. Buchholz VR, Flossdorf M, Hensel I, et al. Disparate Individual Fates Compose Robust  
469 CD8<sup>+</sup> T Cell Immunity. *Science*. 2013;340(6132):630-635.

- 470 44. Farber DL, Yudanin NA, Restifo NP. Human memory T cells: generation,  
471 compartmentalization and homeostasis. *Nature Reviews Immunology*. 2014;14(1):24-35.
- 472 45. Kaech SM, Wherry EJ, Ahmed R. Effector and memory T-cell differentiation:  
473 implications for vaccine development. *Nature Reviews Immunology*. 2002;2(4):251-262.
- 474 46. Borducchi EN, Cabral C, Stephenson KE, et al. Ad26/MVA therapeutic vaccination with  
475 TLR7 stimulation in SIV-infected rhesus monkeys. *Nature*. 2016;540(7632):284.
- 476 47. De Boer RJ. Understanding the Failure of CD8+ T-Cell Vaccination against  
477 Simian/Human Immunodeficiency Virus. *Journal of Virology*. 2007;81(6):2838-2848.
- 478 48. Hill AL, Rosenbloom DIS, Nowak MA, Siliciano RF. Insight into treatment of HIV  
479 infection from viral dynamics models. *Immunological Reviews*. 2018;285(1):9-25.
- 480 49. Perelson AS. Modelling viral and immune system dynamics. *Nature Reviews*  
481 *Immunology*. 2002;2(1):28-36.
- 482 50. Perelson AS, Essunger P, Cao Y, et al. Decay characteristics of HIV-1-infected  
483 compartments during combination therapy. *Nature*. 1997;387(6629):188.
- 484 51. Reeves DB, Peterson CW, Kiem H-P, Schiffer JT. Autologous Stem Cell Transplantation  
485 Disrupts Adaptive Immune Responses during Rebound Simian/Human Immunodeficiency Virus  
486 Viremia. *Journal of Virology*. 2017;91(13):e00095-00017.
- 487 52. Wodarz D, Garg N, Komarova NL, et al. Kinetics of CLL cells in tissues and blood  
488 during therapy with the BTK inhibitor ibrutinib. *Blood*. 2014;123(26):4132-4135.
- 489 53. Wodarz D, Nowak MA. Specific therapy regimes could lead to long-term immunological  
490 control of HIV. *Proceedings of the National Academy of Sciences*. 1999;96(25):14464-14469.
- 491 54. Doitsh G, Cavrois M, Lassen KG, et al. Abortive HIV Infection Mediates CD4 T Cell  
492 Depletion and Inflammation in Human Lymphoid Tissue. *Cell*. 2010;143(5):789-801.

- 493 55. Matrajt L, Younan PM, Kiem H-P, Schiffer JT. The Majority of CD4+ T-Cell Depletion  
494 during Acute Simian-Human Immunodeficiency Virus SHIV89.6P Infection Occurs in  
495 Uninfected Cells. *Journal of Virology*. 2014;88(6):3202-3212.
- 496 56. Lavielle M. Mixed Effects Models for the Population Approach: Models, Tasks, Methods  
497 and Tools (ed 1 edition). Boca Raton: Chapman and Hall/CRC; 2014.
- 498 57. Burnham KP, Anderson DR. Model Selection and Multimodel Inference: A Practical  
499 Information-Theoretic Approach (ed 2). New York: Springer-Verlag; 2002.
- 500 58. Elemans M, Basatena N-KSa, Klatt NR, Gkekas C, Silvestri G, Asquith B. Why Don't  
501 CD8+ T Cells Reduce the Lifespan of SIV-Infected Cells In Vivo? *PLOS Computational*  
502 *Biology*. 2011;7(9):e1002200.
- 503 59. Klatt NR, Shudo E, Ortiz AM, et al. CD8+ Lymphocytes Control Viral Replication in  
504 SIVmac239-Infected Rhesus Macaques without Decreasing the Lifespan of Productively  
505 Infected Cells. *PLOS Pathogens*. 2010;6(1):e1000747.
- 506 60. Wong JK, Strain MC, Porrata R, et al. In Vivo CD8+ T-Cell Suppression of SIV Viremia  
507 Is Not Mediated by CTL Clearance of Productively Infected Cells. *PLOS Pathogens*.  
508 2010;6(1):e1000748.
- 509 61. Shridhar V, Chen Y, Gupta P. The CD8 Antiviral Factor (CAF) can suppress HIV-1  
510 transcription from the Long Terminal Repeat (LTR) promoter in the absence of elements  
511 upstream of the CATATAA box. *Virology Journal*. 2014;11(1):130.
- 512 62. Blazek D, Teque F, Mackewicz C, Peterlin M, Levy JA. The CD8+ cell non-cytotoxic  
513 antiviral response affects RNA polymerase II-mediated human immunodeficiency virus  
514 transcription in infected CD4+ cells. *Journal of General Virology*. 2016;97(1):220-224.

- 515 63. Zhang L, Yu W, He T, et al. Contribution of Human  $\alpha$ -Defensin 1, 2, and 3 to the Anti-  
516 HIV-1 Activity of CD8 Antiviral Factor. *Science*. 2002;298(5595):995-1000.
- 517 64. Levy JA, Mackewicz CE, Barker E. Controlling HIV pathogenesis: the role of the  
518 noncytotoxic anti-HIV response of CD8<sup>+</sup> T cells. *Immunology Today*. 1996;17(5):217-224.
- 519 65. A. OA, J. PL. CD4<sup>+</sup> T-cell depletion in HIV infection: mechanisms of immunological  
520 failure. *Immunological Reviews*. 2013;254(1):54-64.
- 521 66. Douek DC, Picker LJ, Koup RA. T Cell Dynamics in HIV-1 Infection. *Annual Review of*  
522 *Immunology*. 2003;21(1):265-304.
- 523 67. Okoye A, Meier-Schellersheim M, Brenchley JM, et al. Progressive CD4<sup>+</sup> central-  
524 memory T cell decline results in CD4<sup>+</sup> effector-memory insufficiency and overt disease in  
525 chronic SIV infection. *Journal of Experimental Medicine*. 2007;204(9):2171-2185.
- 526 68. Okoye AA, Rohankhedkar M, Abana C, et al. Naive T cells are dispensable for memory  
527 CD4<sup>+</sup> T cell homeostasis in progressive simian immunodeficiency virus infection. *Journal of*  
528 *Experimental Medicine*. 2012;209(4):641-651.
- 529 69. Zhen A, Peterson CW, Carrillo MA, et al. Long-term persistence and function of  
530 hematopoietic stem cell-derived chimeric antigen receptor T cells in a nonhuman primate model  
531 of HIV/AIDS. *PLOS Pathogens*. 2017;13(12):e1006753.
- 532 70. Krenger W, Blazar BR, Holländer GA. Thymic T-cell development in allogeneic stem  
533 cell transplantation. *Blood*. 2011;117(25):6768-6776.
- 534 71. Roux E, Dumont-Girard F, Starobinski M, et al. Recovery of immune reactivity after T-  
535 cell-depleted bone marrow transplantation depends on thymic activity. *Blood*. 2000;96(6):2299-  
536 2303.

- 537 72. Lapidot T, Dar A, Kollet O. How do stem cells find their way home? *Blood*.  
538 2005;106(6):1901-1910.
- 539 73. Chute J. Stem cell homing. *Current Opinion in Hematology*. 2006;13(6):399-406.
- 540 74. Markowitz M, Louie M, Hurley A, et al. A Novel Antiviral Intervention Results in More  
541 Accurate Assessment of Human Immunodeficiency Virus Type 1 Replication Dynamics and T-  
542 Cell Decay In Vivo. *Journal of Virology*. 2003;77(8):5037-5038.
- 543 75. Cardozo EF, Andrade A, Mellors JW, Kuritzkes DR, Perelson AS, Ribeiro RM.  
544 Treatment with integrase inhibitor suggests a new interpretation of HIV RNA decay curves that  
545 reveals a subset of cells with slow integration. *PLOS Pathogens*. 2017;13(7):e1006478.
- 546 76. Chen HY, Mascio MD, Perelson AS, Ho DD, Zhang L. Determination of virus burst size  
547 in vivo using a single-cycle SIV in rhesus macaques. *Proceedings of the National Academy of*  
548 *Sciences*. 2007;104(48):19079-19084.
- 549 77. Ramratnam B, Bonhoeffer S, Binley J, et al. Rapid production and clearance of HIV-1  
550 and hepatitis C virus assessed by large volume plasma apheresis. *The Lancet*.  
551 1999;354(9192):1782-1785.
- 552

## 553 **Figure Legends**

554 **Figure 1. Study design and mathematical modeling.** **A.** Four animals were infected with  
555 SHIV, suppressed with cART and underwent TBI/HSPC transplantation without editing of  
556 CCR5 (Transplant group). A control group of four animals did not receive TBI or HSPC  
557 transplantation. Both groups underwent ATI approximately one year after cART initiation. **B.**  
558 Mathematical model for T cell reconstitution. Each circle represents a cell compartment:  $T$   
559 represents the HSPCs from the transplant;  $P$ , the progenitor cells in bone marrow (BM) and  
560 Thymus;  $S$  and  $N$ ,  $CD4^+CCR5^+$  and  $CD4^+CCR5^-$  T cells, respectively;  $M$  and  $E$ , the  $CD8^+$  T cells  
561 with naïve and central memory phenotypes, and effector memory phenotypes, respectively.  $N$   
562 cells come from the thymus at a rate  $\lambda_f$ , grow with maximum rate  $r_n$ , upregulate CCR5 at rate  $\lambda_n$ ,  
563 and are cleared at rate  $d_n$ .  $S$  cells grow with maximum division rate  $r_s$ , downregulate CCR5 at a  
564 rate  $\lambda_s$ , and are cleared at rate  $d_s$ .  $M$  cells have thymic input of  $\lambda_e$ , grow with maximum division  
565 rate  $r_m$ , differentiate to effector memory at rate  $\lambda_m$ , and are cleared at rate  $d_m$ . The  $E$  compartment  
566 grows with maximum division rate  $r_e$  and is cleared at rate  $d_e$ . All  $CD4^+$  and  $CD8^+$  T cell subsets  
567 compete to grow logistically with same carrying capacity  $K$ . **C.** Mathematical model for virus  
568 dynamics. We adapted the previous model by including the following assumptions. Susceptible  
569 cells,  $S$ , are infected by the virus,  $V$ , at rate  $\beta$ . A fraction  $\tau$  of the infected cells produce virus,  $I_p$ ,  
570 and the other fraction become unproductively infected,  $I_u$ . All infected cells die at rate  $\delta_I$ .  $I_p$  cells  
571 arise from activation of latently infected cells at rate  $\zeta L$ , produce virus at a rate  $\pi$ , that is cleared  
572 at rate  $\gamma$ .  $CD8^+$   $M$  cells proliferate in the presence of infection with rate  $\omega_8$  from which a fraction  
573  $f$  become SHIV-specific  $CD8^+$  effector T cells,  $E_h$ , that are removed at a rate  $d_h$ . These effector  
574 cells reduce virus production or infectivity by  $1/(1+\theta E_h)$ , or  $1/(1+\phi E_h)$ , respectively. Non-



575 susceptible  $CD4^+$  T cells upregulate CCR5 in the presence of infection and replenish the  
576 susceptible pool with rate  $\omega_4$ .

577

578 **Figure 2.  $CD4^+$  and  $CD8^+$  T cell dynamics post-transplantation, pre-ATI.** **A.**  $CD4^+CCR5^+$ ,  
579 **B.**  $CD4^+CCR5^-$ , and **C.** total  $CD8^+$  T cells from animals in the control (blue) and transplant  
580 groups (red). **D.** Range of blood  $CD4^+$  and  $CD8^+$  T cell counts using all data points for the period  
581 before ATI in control animals (p-value calculated with a paired t-test for averaged measurements  
582 post-transplant). **E.** Distribution of the growth rate estimates of  $CD4^+CCR5^+$ ,  $CD4^+CCR5^-$ , and  
583  $CD8^+$  T cells using all data points from time of transplant until their levels reached set point in  
584 transplanted animals (p-value calculated using a paired t-test). We assumed set point as the data  
585 point after which the sum of consecutive changes from the moment of transplant in T cell counts  
586 was smaller or equal to zero. **F.** Correlation between total  $CD8^+$  T cell and  $CD8^+$   $T_{EM}$  cell counts  
587 for all data points post-transplant in transplanted animals (p-value computed using repeated  
588 measures correlation test).

589

590 **Figure 3. Mathematical modeling of T cell reconstitution dynamics.** **A.** Mathematical model  
591 that most parsimoniously explains the T cell reconstitution data. Each circle represents a cell  
592 compartment:  $T$  represents the HSPCs from the transplant;  $P$ , the progenitor cells in bone  
593 marrow (BM) and Thymus;  $S$  and  $N$ ,  $CD4^+CCR5^+$  and  $CD4^+CCR5^-$  T cells, respectively;  $M$  and  
594  $E$ , the  $CD8^+$  T cells with naïve and central memory phenotypes, and effector memory  
595 phenotypes, respectively. **B-E:** Model predictions (black solid lines) vs. empirical data (red  
596 diamonds) for peripheral subset counts from animal A11200 in the transplant group. **B.**  
597  $CD4^+CCR5^+$ , **C.**  $CD4^+CCR5^-$ , **D.**  $CD8^+$  Total, **E.**  $CD8^+$   $T_{EM}$  and  $T_{naive}+T_{CM}$ . **F.** Model prediction

598 of the proliferation of CD4<sup>+</sup>CCR5<sup>+</sup> T cells (solid line) and upregulation of CCR5 (dashed line)  
599 over time for animal A11200.

600

601 **Figure 4. Plasma viral load and CD4<sup>+</sup> T cell kinetics after ATI.** **A.** Plasma viral loads, **B.**  
602 peripheral blood CD4<sup>+</sup>CCR5<sup>+</sup> T-cell counts, and **C.** CD4<sup>+</sup>CCR5<sup>-</sup> T-cell counts from animals in  
603 the control (blue) and transplant (red) groups, respectively. **D-G:** Distributions of **D.** peak viral  
604 load post-ATI, **E.** viral load at endpoint necropsy, **F.** CD4<sup>+</sup>CCR5<sup>+</sup> T-cell nadir post-ATI, **G.**  
605 CD4<sup>+</sup>CCR5<sup>-</sup> T-cell nadir post-ATI. P-values were calculated using Mann-Whitney test. **H.**  
606 Correlations between plasma viral load and peripheral blood CD4<sup>+</sup>CCR5<sup>+</sup> T-cells in each animal  
607 post-ATI. Each panel shows the timepoints post-ATI for each animal. P-values in each panel  
608 were calculated using Spearman's rank test for all time points post-ATI for the corresponding  
609 animal.

610

611 **Figure 5. Mathematical modeling of virus and T cell kinetics during HSPC transplantation.**  
612 **A.** Mathematical model that most parsimoniously describes the relationship between plasma viral  
613 load and peripheral T-cell counts. CD4<sup>+</sup>CCR5<sup>+</sup> T cells,  $S$ , are susceptible to the virus,  $V$ . Infected  
614 cells are divided into those that are able to produce virus,  $I_p$ , or not,  $I_u$ . Precursor CD8<sup>+</sup> cells,  $M$ ,  
615 divide and differentiate in the presence of infected cells becoming SHIV-specific effector cells,  
616  $E_h$ .  $E_h$  cells reduce virus production by a factor of  $1/(1+\theta E_h)$ . The model assumes a constant  
617 activation of latent cells,  $\bar{L}$ . **B.** Best fits of the model (black lines) to SHIV RNA, and blood  
618 CD4<sup>+</sup>CCR5<sup>+</sup> and CD4<sup>+</sup>CCR5<sup>-</sup> T cell counts. Scatterplots of the SHIV-dependent CD8  
619 proliferation rate ( $\omega_8$ ) vs. **C.** CD4<sup>+</sup>CCR5<sup>+</sup> nadir, and **D.** final observed viral load from all  
620 animals; (p-values calculated using Spearman's rank test). **E-F:** Individual parameter estimates

621 of **E.** the SHIV-dependent CD8 proliferation rate ( $\omega_8$ ) and **F.** the time of rebound after ATI (see  
622 text). Blue: control, and red: transplant groups (p-values calculated by Mann-Whitney test).

623

624 **Figure 6. Model predictions for post-rebound viral control after CCR5 gene-edited HSPC**

625 **transplant. A.** Schematic of the extended mathematical model that now includes CCR5-edited,

626 protected cells. Now, protected cells from transplant:  $T_p$ , protected progenitor cells in bone

627 marrow/thymus:  $P_p$ , and protected  $CD4^+CCR5^-$  T cells:  $N_p$  are included. The initial fraction of

628 protected cells is represented by the parameter  $f_p$ . **B.** Predictions for plasma viral load up to one

629 year post-ATI using the adapted model for varying values of  $f_p$  (using parameter estimates from

630 animal Z09144). **C-F.** Predictions for plasma viral load (heat-map color) for each animal at a

631 given time post-ATI (x-axis) and a given  $f_p$  (y-axis). **G-H.** Predicted maximum decrease of

632  $CD4^+CCR5^+$  T cells during the first 10 weeks after ATI for the minimum fraction of protected

633 cells required to obtain post-rebound control after 2 years using parameter estimates for each

634 animal with (**G.**) and without (**H.**) measurement error.

635

636

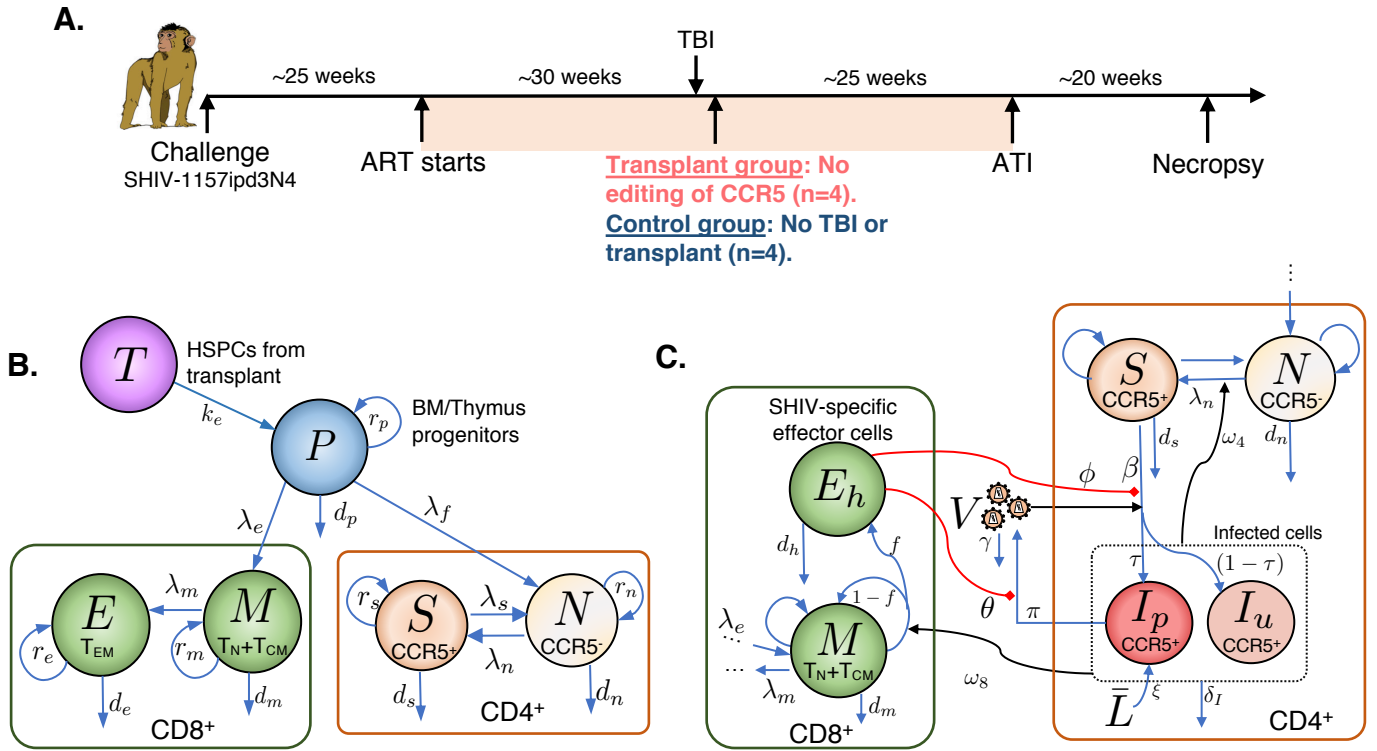

**Figure 1. Study design and mathematical modeling.** **A.** Four animals were infected with SHIV, suppressed with cART and underwent TBI/HSPC transplantation without editing of CCR5 (Transplant group). A control group of four animals did not receive TBI or HSPC transplantation. Both groups underwent ATI approximately one year after cART initiation. **B.** Mathematical model for T cell reconstitution. Each circle represents a cell compartment:  $T$  represents the HSPCs from the transplant;  $P$ , the progenitor cells in bone marrow (BM) and Thymus;  $S$  and  $N$ ,  $CD4^+CCR5^+$  and  $CD4^+CCR5^-$  T cells, respectively;  $M$  and  $E$ , the  $CD8^+$  T cells with naïve and central memory phenotypes, and effector memory phenotypes, respectively.  $N$  cells come from the thymus at a rate  $\lambda_f$ , grow with maximum rate  $r_n$ , upregulate CCR5 at rate  $\lambda_n$ , and are cleared at rate  $d_n$ .  $S$  cells grow with maximum division rate  $r_s$ , downregulate CCR5 at a rate  $\lambda_s$ , and are cleared at rate  $d_s$ .  $M$  cells have thymic input of  $\lambda_e$ , grow with maximum division rate  $r_m$ , differentiate to effector memory at rate  $\lambda_m$ , and are cleared at rate  $d_m$ . The  $E$  compartment grows with maximum division rate  $r_e$  and is cleared at rate  $d_e$ . All  $CD4^+$  and  $CD8^+$  T cell subsets compete to grow logistically with same carrying capacity  $K$ . **C.** Mathematical model for virus dynamics. We adapted the previous model by including the following assumptions. Susceptible cells,  $S$ , are infected by the virus,  $V$ , at rate  $\beta$ . A fraction  $\tau$  of the infected cells produce virus,  $I_p$ , and the other fraction become unproductively infected,  $I_u$ . All infected cells die at rate  $\delta_I$ .  $I_p$  cells arise from activation of latently infected cells at rate  $\xi L$ , produce virus at a rate  $\pi$  that is cleared at rate  $\gamma$ .  $CD8^+$   $M$  cells proliferate in the presence of infection with rate  $\omega_8$  from which a fraction  $f$  become SHIV-specific  $CD8^+$  effector T cells,  $E_h$ , that are removed at a rate  $d_h$ . These effector cells reduce virus production or infectivity by  $1/(1+\theta E_h)$ , or  $1/(1+\phi E_h)$ , respectively. Non-susceptible  $CD4^+$  T cells upregulate CCR5 in the presence of infection and replenish the susceptible pool with rate  $\omega_4$ .

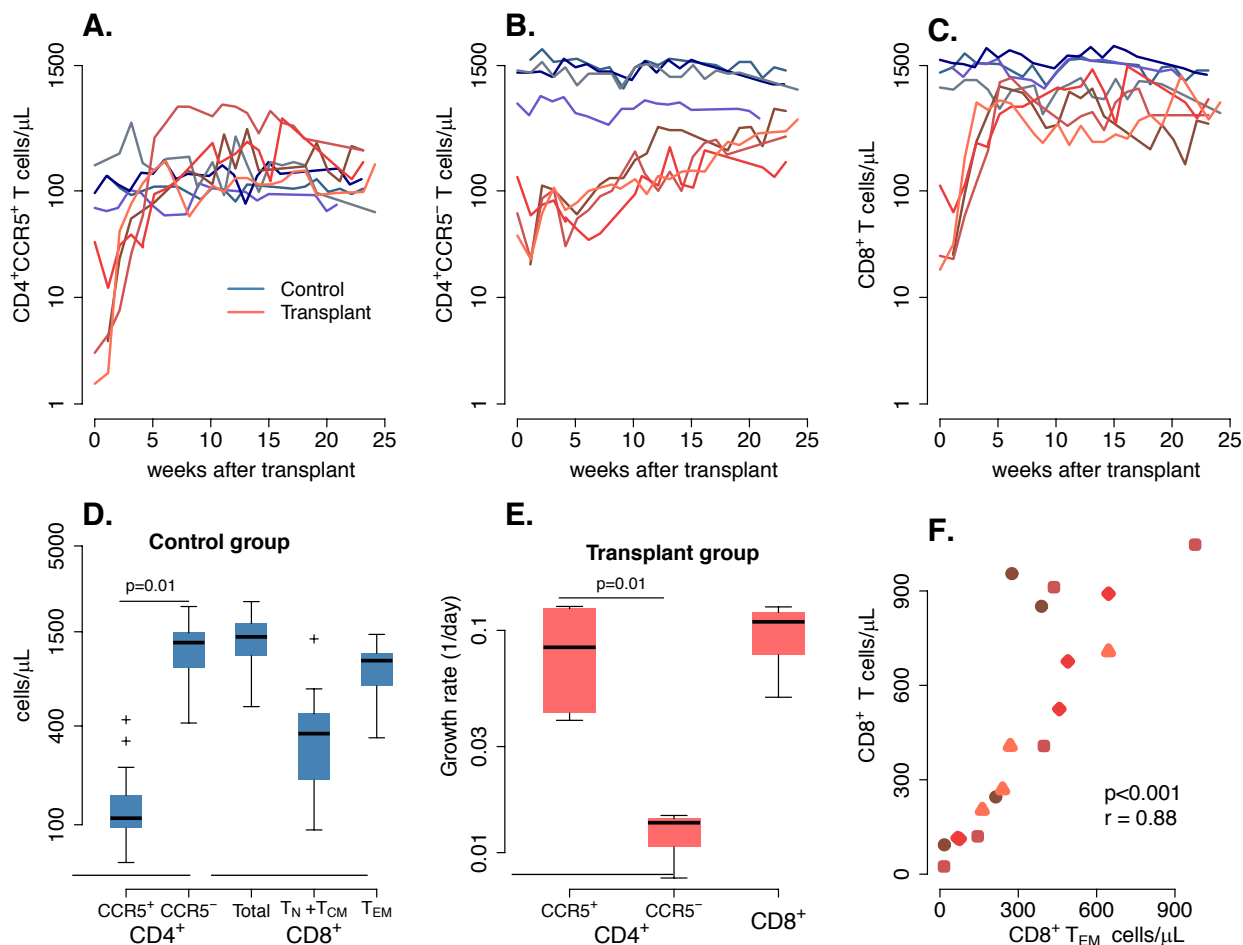

**Figure 2. CD4<sup>+</sup> and CD8<sup>+</sup> T cell dynamics post-transplantation, pre-ATI.** **A.** CD4<sup>+</sup>CCR5<sup>+</sup>, **B.** CD4<sup>+</sup>CCR5<sup>-</sup>, and **C.** total CD8<sup>+</sup> T cells from animals in the control (blue) and transplant groups (red). **D.** Range of blood CD4<sup>+</sup> and CD8<sup>+</sup> T cell counts using all data points for the period before ATI in control animals (p-value calculated with a paired t-test for averaged measurements post-transplant). **E.** Distribution of the growth rate estimates of CD4<sup>+</sup>CCR5<sup>+</sup>, CD4<sup>+</sup>CCR5<sup>-</sup>, and CD8<sup>+</sup> T cells using all data points from time of transplant until their levels reached set point in transplanted animals (p-value calculated using a paired t-test). We assumed set point as the data point after which the sum of consecutive changes from the moment of transplant in T cell counts was smaller or equal to zero. **F.** Correlation between total CD8<sup>+</sup> T cell and CD8<sup>+</sup> T<sub>EM</sub> cell counts for all data points post-transplant in transplanted animals (p-value computed using repeated measures correlation test).

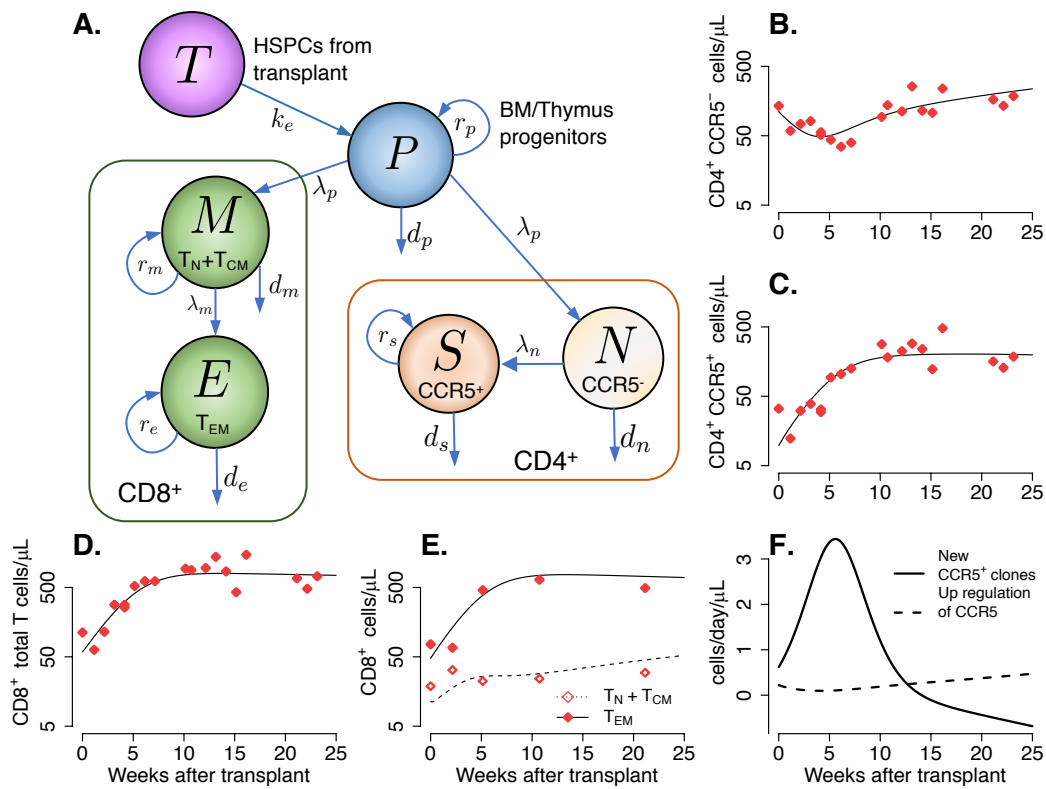

**Figure 3. Mathematical modeling of T cell reconstitution dynamics. A.**

Mathematical model that most parsimoniously explains the T cell reconstitution data. Each circle represents a cell compartment:  $T$  represents the HSPCs from the transplant;  $P$ , the progenitor cells in bone marrow (BM) and Thymus;  $S$  and  $N$ ,  $CD4^+CCR5^+$  and  $CD4^+CCR5^-$  T cells, respectively;  $M$  and  $E$ , the  $CD8^+$  T cells with naïve and central memory phenotypes, and effector memory phenotypes, respectively. **B-E:** Model predictions (black solid lines) vs. empirical data (red diamonds) for peripheral subset counts from animal A11200 in the transplant group. **B.**  $CD4^+CCR5^+$ , **C.**  $CD4^+CCR5^-$ , **D.**  $CD8^+$  Total, **E.**  $CD8^+$   $T_{EM}$  and  $T_{naive}+T_{CM}$ . **F.** Model prediction of the proliferation of  $CD4^+CCR5^+$  T cells (solid line) and upregulation of CCR5 (dashed line) over time for animal A11200.

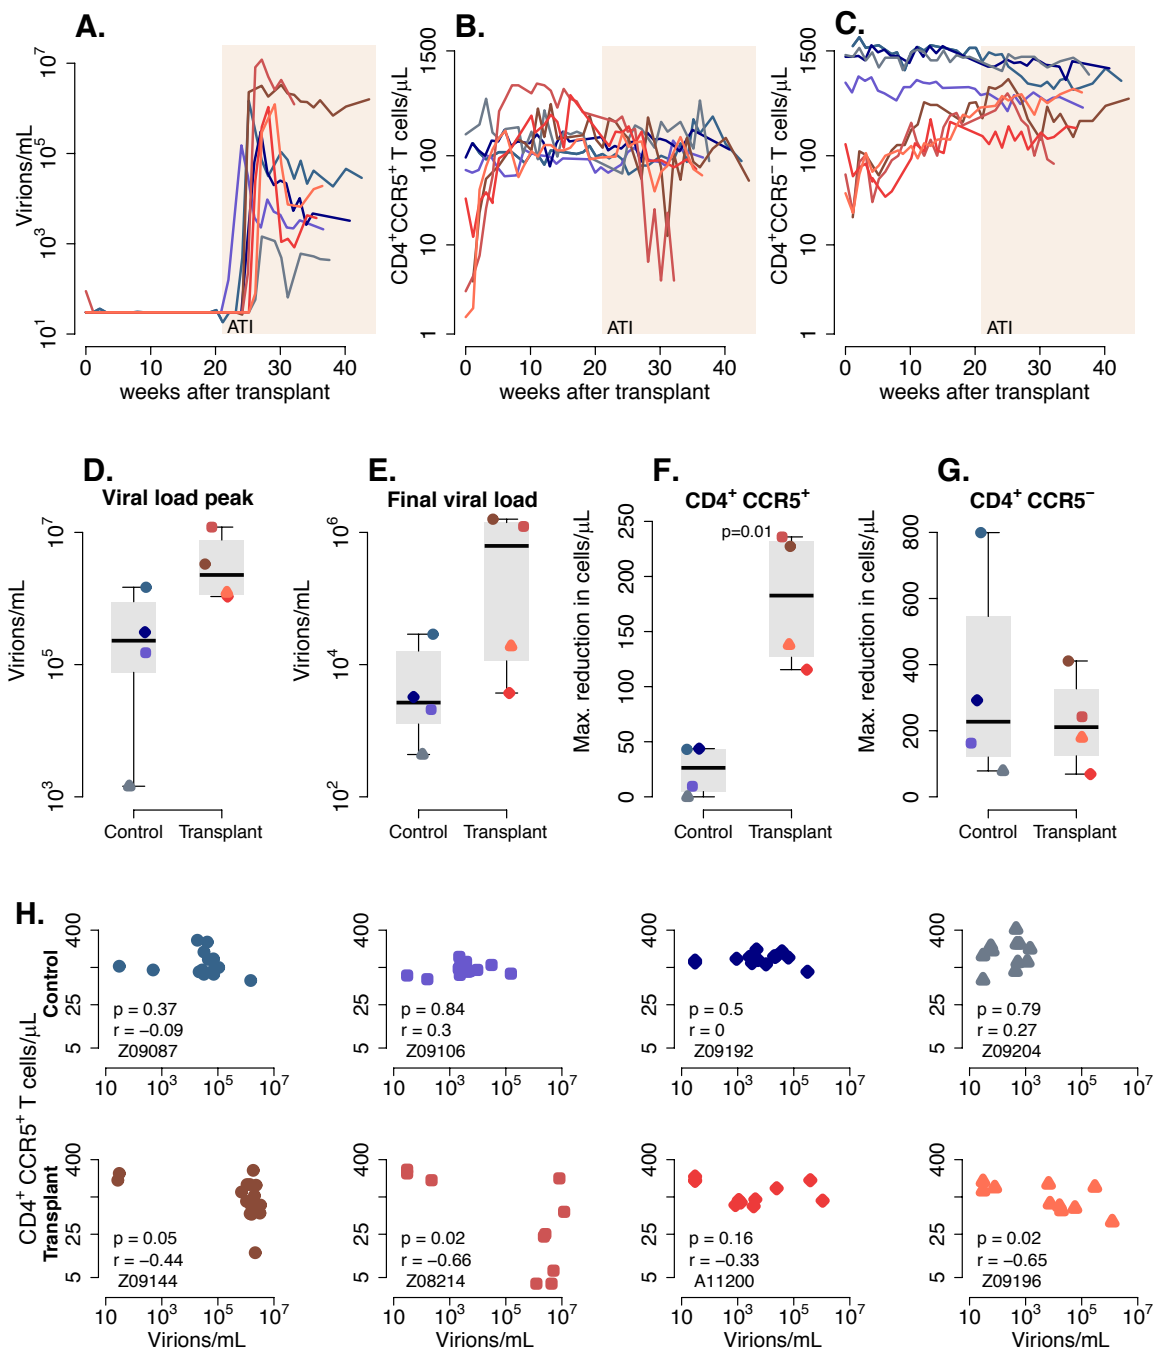

**Figure 4. Plasma viral load and CD4<sup>+</sup> T cell kinetics after ATI.** **A.** Plasma viral loads, **B.** peripheral blood CD4<sup>+</sup>CCR5<sup>+</sup> T-cell counts, and **C.** CD4<sup>+</sup>CCR5<sup>-</sup> T-cell counts from animals in the control (blue) and transplant (red) groups, respectively. **D-G:** Distributions of **D.** peak viral load post-ATI, **E.** viral load at endpoint necropsy, **F.** CD4<sup>+</sup>CCR5<sup>+</sup> T-cell nadir post-ATI, **G.** CD4<sup>+</sup>CCR5<sup>-</sup> T-cell nadir post-ATI. P-values were calculated using Mann-Whitney test. **H.** Correlations between plasma viral load and peripheral blood CD4<sup>+</sup>CCR5<sup>+</sup> T-cells in each animal post-ATI. Each panel shows the timepoints post-ATI for each animal. P-values in each panel were calculated using Spearman's rank test for all time points post-ATI for the corresponding animal.

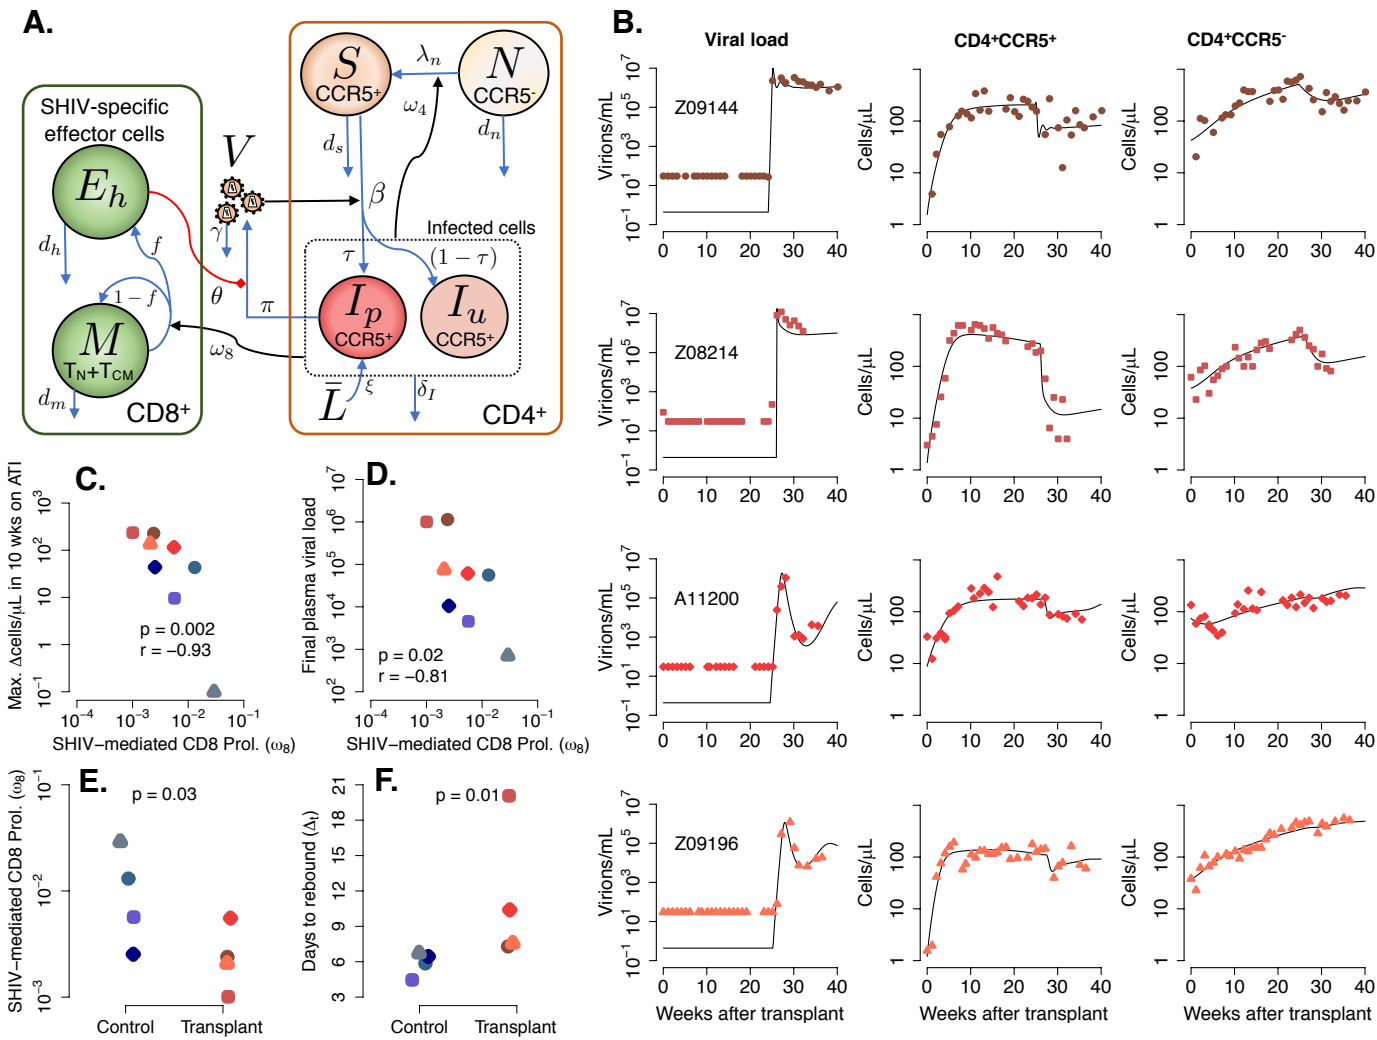

**Figure 5. Mathematical modeling of virus and T cell kinetics during HSPC transplantation. A.** Mathematical model that most parsimoniously describes the relationship between plasma viral load and peripheral T-cell counts. CD4<sup>+</sup>CCR5<sup>+</sup> T cells,  $S$ , are susceptible to the virus,  $V$ . Infected cells are divided into those that are able to produce virus,  $I_p$ , or not,  $I_u$ . Precursor CD8<sup>+</sup> cells,  $M$ , divide and differentiate in the presence of infected cells becoming SHIV-specific effector cells,  $E_h$ .  $E_h$  cells reduce virus production by a factor of  $1/(1+\theta E_h)$ . The model assumes a constant activation of latent cells,  $L$ . **B.** Best fits of the model (black lines) to SHIV RNA, and blood CD4<sup>+</sup>CCR5<sup>+</sup> and CD4<sup>+</sup>CCR5<sup>-</sup> T cell counts. Scatterplots of the SHIV-dependent CD8 proliferation rate ( $\omega_8$ ) vs. **C.** CD4<sup>+</sup>CCR5<sup>+</sup> nadir, and **D.** final observed viral load from all animals; (p-values calculated using Spearman's rank test). **E-F:** Individual parameter estimates of **E.** the SHIV-dependent CD8 proliferation rate ( $\omega_8$ ) and **F.** the time of rebound after ATI (see text). Blue: control, and red: transplant groups (p-values calculated by Mann-Whitney test).



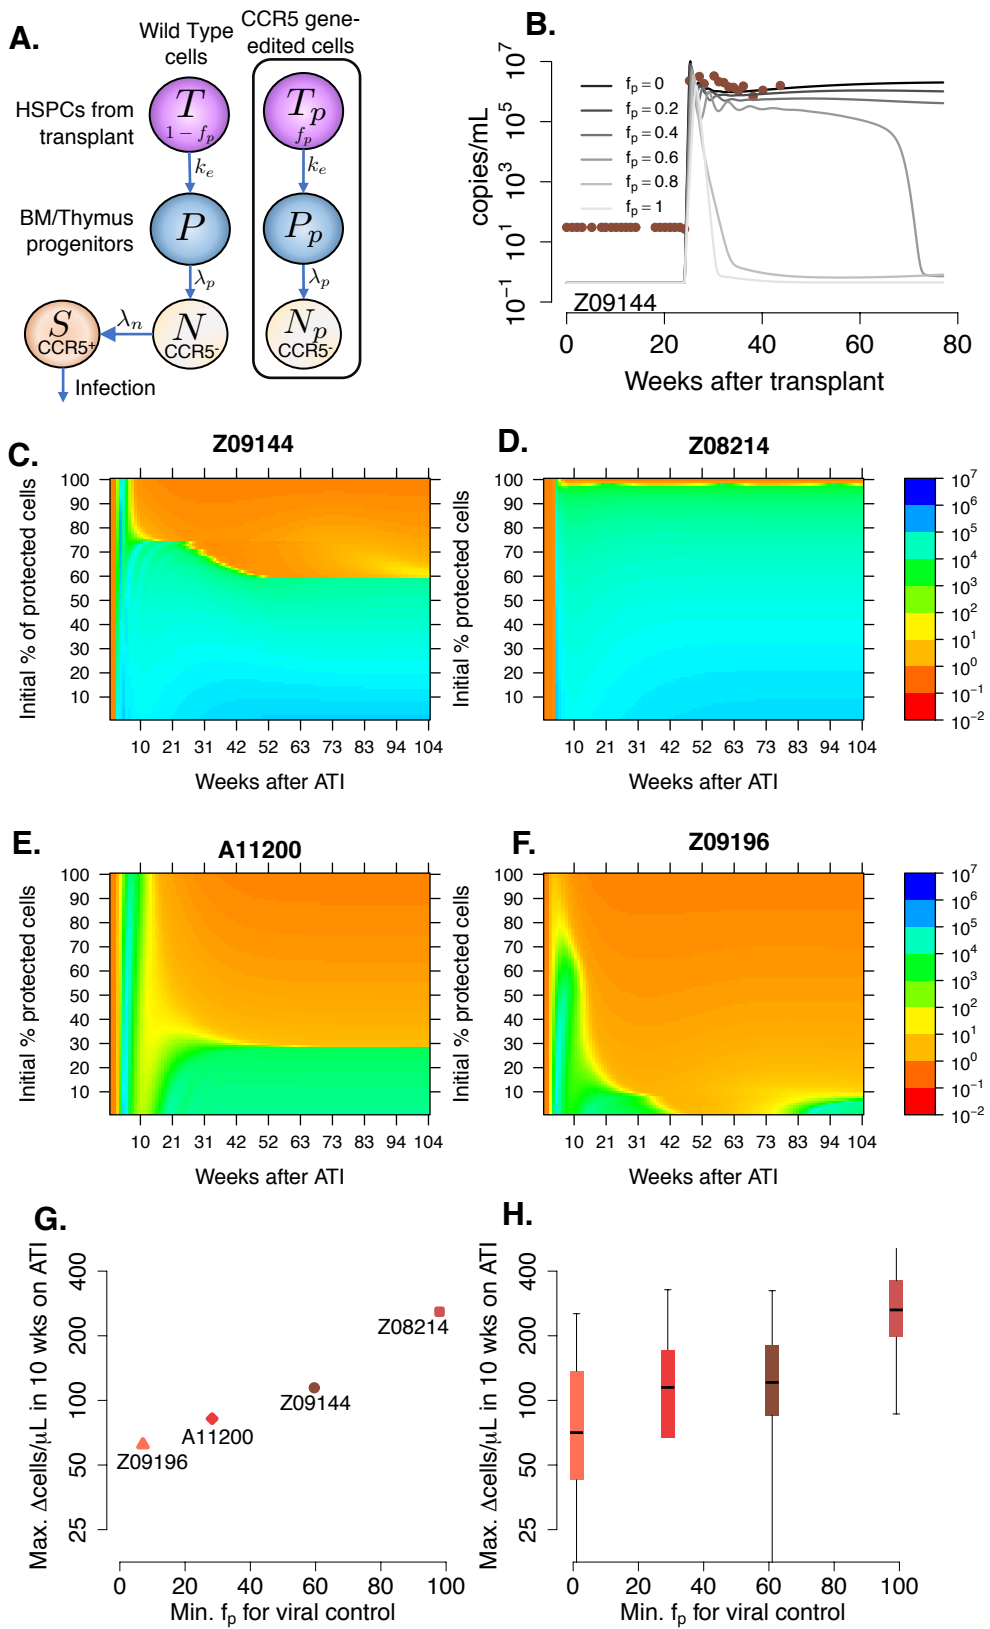

**Figure 6. Model predictions for post-rebound viral control after CCR5 gene-edited HSPC transplant.** **A.** Schematic of the extended mathematical model that now includes CCR5-edited, protected cells. Now, protected cells from transplant:  $T_p$ , protected progenitor cells in bone marrow/thymus:  $P_p$ , and protected CD4<sup>+</sup>CCR5<sup>-</sup> T cells:  $N_p$  are included. The initial fraction of protected cells is represented by the parameter  $f_p$ . **B.** Predictions for plasma viral load up to one year post-ATI using the adapted model for varying values of  $f_p$  (using parameter estimates from animal Z09144). **C-F.** Predictions for plasma viral load (heat-map color) for each animal at a given time post-ATI (x-axis) and a given  $f_p$  (y-axis). **G-H.** Predicted maximum decrease of CD4<sup>+</sup>CCR5<sup>+</sup> T cells during the first 10 weeks after ATI for the minimum fraction of protected cells required to obtain post-rebound control after 2 years using parameter estimates for each animal with (**G.**) and without (**H.**) measurement error.
